# Supplementary material for: Estimating the current and future cancer burden in Canada: methodological framework of the Canadian population attributable risk of cancer (ComPARe) study
Source: PubMed Central journal article supplement — BMJ Open. 2018 Aug 1;8(7):e022378. doi: 10.1136/bmjopen-2018-022378 (PMC6074628; doi:10.1136/bmjopen-2018-022378), 2018-08-01
Supplement: bmjopen-2018-022378.draft_revisions.pdf [file bmjopen-2018-022378.draft_revisions.pdf]

# BMJ Open

BMJ Open is committed to open peer review. As part of this commitment we make the peer review history of every article we publish publicly available.

When an article is published we post the peer reviewers' comments and the authors' responses online. We also post the versions of the paper that were used during peer review. These are the versions that the peer review comments apply to.

The versions of the paper that follow are the versions that were submitted during the peer review process. They are not the versions of record or the final published versions. They should not be cited or distributed as the published version of this manuscript.

BMJ Open is an open access journal and the full, final, typeset and author-corrected version of record of the manuscript is available on our site with no access controls, subscription charges or pay-per-view fees (<http://bmjopen.bmj.com>).

If you have any questions on BMJ Open's open peer review process please email [info.bmjopen@bmj.com](mailto:info.bmjopen@bmj.com)

# BMJ Open

## Estimating the Current and Future Cancer Burden in Canada: Methodologic Framework of the Canadian Population Attributable Risk of Cancer (ComPARE) Study

|                               |                                                                                                                                                                                                                                                                                                                                                                                                                                                                                                                                                                                                                                                                                                                                                                                                                                                                                                                                                                                                                                                                                                                                                                                                                                                                                                                                                                                                                                                                                                                                                                                                                                     |
|-------------------------------|-------------------------------------------------------------------------------------------------------------------------------------------------------------------------------------------------------------------------------------------------------------------------------------------------------------------------------------------------------------------------------------------------------------------------------------------------------------------------------------------------------------------------------------------------------------------------------------------------------------------------------------------------------------------------------------------------------------------------------------------------------------------------------------------------------------------------------------------------------------------------------------------------------------------------------------------------------------------------------------------------------------------------------------------------------------------------------------------------------------------------------------------------------------------------------------------------------------------------------------------------------------------------------------------------------------------------------------------------------------------------------------------------------------------------------------------------------------------------------------------------------------------------------------------------------------------------------------------------------------------------------------|
| Journal:                      | <i>BMJ Open</i>                                                                                                                                                                                                                                                                                                                                                                                                                                                                                                                                                                                                                                                                                                                                                                                                                                                                                                                                                                                                                                                                                                                                                                                                                                                                                                                                                                                                                                                                                                                                                                                                                     |
| Manuscript ID                 | bmjopen-2018-022378                                                                                                                                                                                                                                                                                                                                                                                                                                                                                                                                                                                                                                                                                                                                                                                                                                                                                                                                                                                                                                                                                                                                                                                                                                                                                                                                                                                                                                                                                                                                                                                                                 |
| Article Type:                 | Protocol                                                                                                                                                                                                                                                                                                                                                                                                                                                                                                                                                                                                                                                                                                                                                                                                                                                                                                                                                                                                                                                                                                                                                                                                                                                                                                                                                                                                                                                                                                                                                                                                                            |
| Date Submitted by the Author: | 16-Feb-2018                                                                                                                                                                                                                                                                                                                                                                                                                                                                                                                                                                                                                                                                                                                                                                                                                                                                                                                                                                                                                                                                                                                                                                                                                                                                                                                                                                                                                                                                                                                                                                                                                         |
| Complete List of Authors:     | <p>Brenner, Darren; University of Calgary Cumming School of Medicine, Oncology; Alberta Health Services, Cancer Epidemiology and Prevention Research</p> <p>Poirier, Abbey; Alberta Health Services, Cancer Epidemiology and Prevention Research</p> <p>Walter, Stephen ; McMaster University , Department of Health Research Methods, Evidence, and Impact</p> <p>King, Will; Queen's University, Department of Public Health Sciences</p> <p>Franco, Eduardo; McGill University, Department of Oncology; McGill University Department of Epidemiology Biostatistics and Occupational Health</p> <p>Demers, Paul; Cancer Care Ontario, Occupational Cancer Research Centre</p> <p>Villeneuve, Paul; Carleton University Department of Health Sciences</p> <p>Ruan, Yibing; Alberta Health Services, Cancer Epidemiology and Prevention Research</p> <p>Khandwala, Farah; Alberta Health Services, Cancer Epidemiology and Prevention Research</p> <p>Grevers, Xin; Alberta Health Services, Cancer Epidemiology and Prevention Research</p> <p>Nuttall, Robert; Health Quality Ontario</p> <p>Smith, Leah; Canadian Cancer Society</p> <p>De, Prithwish; Cancer Care Ontario</p> <p>Volesky, Karena; McGill University, Department of Oncology; McGill University Department of Epidemiology Biostatistics and Occupational Health</p> <p>O'Sullivan, Dylan; Queen's University, Department of Public Health Sciences</p> <p>Hystad, Perry ; Oregon State University</p> <p>Friedenreich, CM; Alberta Health Services, Cancer Epidemiology and Prevention Research; University of Calgary Cumming School of Medicine, Oncology</p> |
| Keywords:                     | Epidemiology < ONCOLOGY, Potential impact fraction, Population attributable risk, Cancer, STATISTICS & RESEARCH METHODS, Risk factors                                                                                                                                                                                                                                                                                                                                                                                                                                                                                                                                                                                                                                                                                                                                                                                                                                                                                                                                                                                                                                                                                                                                                                                                                                                                                                                                                                                                                                                                                               |
|                               |                                                                                                                                                                                                                                                                                                                                                                                                                                                                                                                                                                                                                                                                                                                                                                                                                                                                                                                                                                                                                                                                                                                                                                                                                                                                                                                                                                                                                                                                                                                                                                                                                                     |

1  
2  
3  
4  
5  
6  
7  
8  
9  
10  
11  
12  
13  
14  
15  
16  
17  
18  
19  
20  
21  
22  
23  
24  
25  
26  
27  
28  
29  
30  
31  
32  
33  
34  
35  
36  
37  
38  
39  
40  
41  
42  
43  
44  
45  
46  
47  
48  
49  
50  
51  
52  
53  
54  
55  
56  
57  
58  
59  
60

SCHOLARONE™  
Manuscripts

For peer review only

1  
2  
3 Estimating the Current and Future Cancer Burden in Canada: Methodologic Framework of the  
4 Canadian Population Attributable Risk of Cancer (ComPARE) Study  
5  
6  
7

8 Darren R. Brenner\*<sup>1,2</sup>, Abbey E. Poirier<sup>2</sup>, Stephen D. Walter<sup>3</sup>, Will D. King<sup>4</sup>, Eduardo L.  
9 Franco<sup>5,6</sup>, Paul Demers<sup>7</sup>, Paul J. Villeneuve<sup>8</sup>, Yibing Ruan<sup>2</sup>, Farah Khandwala<sup>2</sup>, Xin Grevers<sup>2</sup>,  
10 Robert Nuttall<sup>9</sup>, Leah Smith<sup>9</sup>, Prithwish De<sup>10</sup>, Karena Volesky<sup>5,6</sup>, Dylan O'Sullivan<sup>4</sup>, Perry  
11 Hystad<sup>11</sup>, Christine M. Friedenreich<sup>1,2</sup>, on behalf of the ComPARE Study Group<sup>12</sup>  
12  
13  
14  
15

- 16  
17 1. Departments of Oncology and Community Health Sciences, Cumming School of Medicine,  
18 University of Calgary, Calgary, Alberta, Canada  
19 2. Department of Cancer Epidemiology and Prevention Research, CancerControl Alberta,  
20 Alberta Health Services, Calgary, Alberta, Canada  
21 3. Department of Health Research Methods, Evidence, and Impact, McMaster University,  
22 Hamilton, Ontario, Canada  
23 4. Department of Public Health Sciences, Queen's University, Kingston, Ontario, Canada  
24 5. Department of Epidemiology, Biostatistics and Occupational Health, McGill University,  
25 Montréal, Québec, Canada  
26 6. Department of Oncology, McGill University, Montréal, Québec, Canada  
27 7. Occupational Cancer Research Centre, Toronto, Ontario, Canada  
28 8. Department of Health Sciences, Carleton University, Ottawa, Ontario, Canada  
29 9. Canadian Cancer Society, Toronto, Ontario, Canada  
30 10. Cancer Care Ontario, Toronto, Ontario, Canada  
31 11. College of Public Health and Human Sciences, Oregon State University, Corvallis, Oregon,  
32 United States  
33 12. Additional members of the ComPARE study group:  
34  
35 Elizabeth Holmes<sup>9</sup>  
36 Zeinab El-Masri<sup>10</sup>  
37 Mariam El-Zein<sup>6</sup>  
38 Sheila Bouten<sup>6</sup>  
39 Tasha Narain<sup>4</sup>  
40 Priyanka Gogna<sup>4</sup>  
41  
42  
43  
44

45 \*To Whom Correspondence should be addressed:

46 Darren R. Brenner  
47 Department of Cancer Epidemiology and Prevention Research  
48 CancerControl Alberta, Alberta Health Services  
49 Holy Cross Centre – Room 513C  
50 Box ACB, 2210-2<sup>nd</sup> St. SW, Calgary, AB  
51 T2S 3C3  
52 Phone: 1-403-698-8178  
53 [Darren.Brenner@ucalgary.ca](mailto:Darren.Brenner@ucalgary.ca)  
54  
55  
56  
57  
58  
59  
60

## ABSTRACT

**Introduction:** The Canadian Population Attributable Risk of Cancer (ComPARe) project will quantify the number and proportion of incident cancer cases in Canada, now and projected to 2042, that could be prevented through changes in the prevalence of modifiable exposures associated with cancer. The broad risk factor categories of interest include: tobacco, diet, energy imbalance, infectious diseases, hormonal therapies and environmental factors such as air pollution and residential radon.

**Methods and analysis:** Working as a national network, we will use population attributable risks (PAR) and potential impact fractions (PIF) to model both attributable (current) and avoidable (future) cancers. The latency periods and the temporal relationships between exposures and cancer diagnoses will be accounted for in the analyses. For PAR estimates, historical exposure prevalence data and the most recent provincial and national cancer incidence data will be used. For PIF estimates, we will model alternative or “counterfactual” distributions for cancer risk factor exposures to assess how cancer incidence could be reduced under different scenarios of population exposure, projecting incidence to 2042.

**Dissemination:** The framework provided can be readily extended and applied to other populations or jurisdictions outside of Canada. An embedded knowledge translation and exchange component of this study with our Canadian Cancer Society partners will ensure that these findings are translated to cancer programs and policies aimed at population-based cancer risk reduction strategies.

## STRENGTHS AND LIMITATIONS OF THIS STUDY

- We report a detailed and transparent approach for conducting large attributable risk estimation projects to assess the impact of multiple risk factors.
- We have considered projections of both the exposure prevalence and cancer incidence with multiple approaches, which is an improvement over unrealistic fixed projection models.
- Long-term projections of exposure prevalence and cancer incidence are statistically challenging and involve a great deal of uncertainty.
- Many of our exposure measures are based on self-reported data, which introduces the possibility of misreporting.

## BACKGROUND

Estimates of the current and future burden of cancer in Canada attributable to known and probable causes of cancer are required to allocate prevention resources optimally. National<sup>1 2</sup> and global cancer incidence projections<sup>3</sup> suggest that the burden of cancer will continue to rise. In Canada and other developed nations, this is largely attributable to growing and aging populations. In addition, despite established associations between modifiable risk factors and cancer risk, sufficient reductions in the prevalence of these risk factors have not been achieved in Canada.<sup>1-3</sup> Identifying exposures and interventions with the greatest potential impacts of reducing cancer risk will aid in implementing prevention programs and policies to combat this growing health challenge.

Several groups, including some members of our Canadian Burden of Cancer - Population Attributable Risk (ComPARE) Study Group, have produced estimates of the current burden of cancer attributable to lifestyle, environmental and infectious exposures in Canadian national<sup>4-6</sup> and provincial<sup>7-15</sup> populations. Additional studies have estimated the future avoidable national<sup>16-20</sup> and global<sup>21</sup> cancer burdens attributable to single exposures. However, population attributable risk (PAR) estimates are dependent on risk factor prevalence, which vary over time and are population specific. Therefore, it is important to frequently update PAR estimates. In addition, several methodologic extensions to these approaches, including modeling the combined impact of multiple risk factors and defining the timing of intervention impacts on subsequent cancer incidence are lacking. A comprehensive estimation of the current and future cancer burden and of the impact of potential reductions in exposure prevalence on cancer incidence at the population are needed.

1  
2  
3 For the ComPARE Study, we developed a methodological framework to estimate the  
4 burden of cancer in Canada using cancer incidence data (2015) and projected incidence trends  
5 (2015-2042). The ComPARE study team brings together the substantive and quantitative  
6 expertise of cancer researchers from across the country. This collaborative, pan-Canadian study  
7 also involves a partnership with the Canadian Cancer Society, a main knowledge end user for  
8 this work, who worked in partnership with the researchers throughout this project. To ensure  
9 methods were rigorously applied and standardized across research labs, we developed a  
10 methodological framework for the estimation of current attributable and future avoidable cancers  
11 associated with modifiable risk factors. This framework extends the work of other groups<sup>22-26</sup>  
12 and is applicable to a range of diseases and populations. Here we describe the approach and  
13 methods used in the ComPARE Study. An overview of earlier methods used to estimate PARs  
14 and preventable impact fractions (PIFs) are presented. We then describe how we used these  
15 methods in the ComPARE Study, and the innovations that we developed to extend them. See  
16 Figure 1 for an outline of our approach.  
17  
18  
19  
20  
21  
22  
23  
24  
25  
26  
27  
28  
29  
30  
31  
32  
33  
34  
35  
36  
37  
38  
39  
40  
41  
42  
43  
44  
45  
46  
47  
48  
49  
50  
51  
52  
53  
54  
55  
56  
57  
58  
59  
60



## METHODS

Figure 1 shows the methodologic framework for the ComPARE study. The concept of PAR or population attributable fraction (PAF) was initially developed by Levin in 1953 to estimate the burden of disease in the general population attributable to a given factor.<sup>27</sup> Attributable risks are predicated on the assumption that there are causal relationships between exposures and disease outcomes, and on the concept of the counterfactual, a scenario counter to actual experience, where exposures to the causal agents no longer exist or can be mitigated.<sup>28</sup>

Since the initial concept of the PAR method was introduced, several statistical and theoretical extensions to the framework have included methods to measure the uncertainty around PARs and the development of the potential impact fraction (PIF). The PIF is an extension of the PAR to consider situations complete removal of the exposure cannot be assumed.<sup>29</sup> The impact of a reduction in the prevalence or population distribution of an exposure and the subsequent impact of an exposure reduction is examined. The PAR and PIF are statistical foundation of the ComPARE Study.

To apply the PAR and PIF to estimate the impacts of reducing exposures, three sources of data are essential (Table 1) : 1) the relative risk of incident disease, or risk distribution associated with exposure; 2) the proportion of the population or cancer cases exposed to the risk or protective factor (sex and age-specific exposure prevalence); and 3) sex and age-specific disease incidence data. These three elements are needed to estimate the proportion of cancer cases that could be prevented, based on the PARs or PIFs. In the following sections, we present the methods used in the ComPARE Study for estimating the current attributable (PAR) and future avoidable (PIF) burdens of cancer.

### *Identifying Risk Factors for Inclusion*

1  
2  
3 A crucial component of attributable cancer estimation is determining which exposures should be  
4 included as causal for incident cancers. Given the considerable amount of epidemiologic and  
5 basic science literature evaluating etiologic associations for cancer, we needed criteria to  
6 determine the level of evidence required for inclusion in our analyses. We developed a hierarchy  
7 of evidence for the ComPARE Study (Figure 2). The World Cancer Research Fund's (WCRF)  
8 Continuous Update Project<sup>30</sup> and the International Agency for Research on Cancer's (IARC)  
9 [Monographs on the Evaluation of Carcinogenic Risks to Humans](#)<sup>31</sup> have devoted substantial  
10 resources, including expert panels, to classifying potentially carcinogenic risks to humans. We  
11 used the recommendations from these international and national panels as our first level of  
12 inclusion. As a second level of evidence, we included exposure/cancer site pairs where high  
13 quality meta-analyses of epidemiologic studies published since the WCRF and IARC reports  
14 demonstrated consistent associations. The exposure and cancer site associations included in the  
15 ComPARE Study are presented in Supplementary Table 1.

### 33 *Estimation of Attributable Cancers*

#### 36 *Exposure Prevalence Data – Including Latency*

37  
38  
39  
40 The biologically relevant time period from initiation of an exposure to development of disease is  
41 highly variable, depending on the exposure and cancer site and it is likely to be measured in  
42 years or even decades for solid tumors. Therefore, we allowed for a period of latency from  
43 exposure to cancer incidence/diagnosis in our assessments. However, exposure prevalence data  
44 were not always available for the long relevant time periods implied by latency. As a proxy  
45 measure for each exposure, we extracted the median or mean follow-up time from exposure  
46 measurement to cancer incidence from large cohort studies. Our assessment of quality of the  
47 cohort studies was evaluated based on their sample size, methods of exposure assessment and  
48  
49  
50  
51  
52  
53  
54  
55  
56  
57  
58  
59  
60

1  
2  
3 length of follow-up, where large cohorts with detailed exposure and longer follow-up were  
4 considered the highest quality. This information concerning the latency period was then  
5 compared with the time periods for which high-quality data on exposure prevalence were  
6 available. We selected prevalence estimates that corresponded to the midpoint of the range of  
7 potential latency periods, as identified from the cohort studies. When these data were not  
8 available, we assumed a 10-year latency period between exposure measurement and cancer  
9 incidence, or used the closest available prevalence estimates. A diagram of our approach to  
10 modelling relevant exposures is shown in Figure 3.  
11  
12  
13  
14  
15  
16  
17  
18  
19  
20  
21

22 To estimate the attributable burden of cancer due to past exposures in Canada, we  
23 developed a hierarchy to select prevalence data from Canadian national and region-specific data  
24 sources, where available. For lifestyle exposures we considered data from large Canadian cohort  
25 studies when data from national population-based surveys were not available. For several  
26 environmental exposures, environmental monitoring data from sites in various parts of Canada  
27 were used. We collected exposure prevalence data overall and, where the data allowed, by sex,  
28 age and province.  
29  
30  
31  
32  
33  
34  
35  
36  
37  
38

### 39 *Cancer Incidence Data*

40  
41  
42 We obtained cancer incidence data for those 18 years of age and older from the Canadian  
43 Cancer Registry (CCR); a national registry of cancer cases covering the entire population of  
44 Canada, including by province and territory. Statistic Canada produces annual data quality  
45 reports for the CCR and each Canadian province and territory has a legislated responsibility for  
46 cancer collection and control, which improves the completeness and population coverage of the  
47 data<sup>32</sup>. Data by province, sex and five-year age group for 2012, being the most recent year of  
48 national data available at the time of the study (except for Quebec data which were extrapolated  
49  
50  
51  
52  
53  
54  
55  
56  
57  
58  
59  
60

1  
2  
3 from 2010) were obtained. Cancer cases were coded in the CCR using the International  
4  
5 Classification of Diseases for Oncology, 3<sup>rd</sup> Edition (ICD-O-3).  
6  
7

### 8 *Estimation of Population Attributable Cancers – Including Uncertainty.*

9  
10  
11 The PAR estimation methods employed for the individual exposures in the ComPARe  
12  
13 Study are presented in Table 1. Since 95% confidence intervals (CIs) cannot be easily calculated  
14  
15 for PARs<sup>33</sup>, Monte Carlo simulation methods were used to estimate 95% CIs around PAR  
16  
17 estimates, where the RR values were drawn from a log normal distribution derived from the RR  
18  
19 and its associated variance estimated from 95% CIs while prevalence values were drawn from a  
20  
21 binomial distribution with parameter  $n$  as the number of survey participants and parameter  $p$  as  
22  
23 the prevalence of exposure estimated from the survey. We simulated 10,000 samples and used  
24  
25 the 2.5<sup>th</sup> and 97.5<sup>th</sup> percentiles of the resulting PAR distribution as the lower and upper limits of  
26  
27 its 95% CI.<sup>34 35</sup>  
28  
29  
30  
31  
32

### 33 *Estimation of Avoidable Cancers*

#### 34 *Exposure Prevalence Data*

35  
36  
37 To estimate the future avoidable cancer burden to 2042, it is necessary to project  
38  
39 exposure prevalence (e.g. to 2032 if a 10-year latency period is used). We used the exposure  
40  
41 prevalence data hierarchy outlined above to identify the optimal exposure prevalence data. For  
42  
43 these data, we focused on sources with longitudinal surveys. For exposures where historical data  
44  
45 allowed past trends to be observed, one of several approaches to model future prevalence were  
46  
47 used. These included linear, logistic growth, multinomial logistic regression, and exponential  
48  
49 curves to predict the future proportion of the population exposed. Prevalence estimates were  
50  
51 projected by sex, and various levels of exposure prevalence. Models were selected based on  
52  
53 expert opinion of the visual evaluation of the fit to past data trends and by avoiding extreme  
54  
55  
56  
57  
58  
59  
60

1  
2  
3 projection scenarios that might have arisen because of some overly influential data points. The  
4  
5 different approaches to model future prevalence reflect different potential scenarios. Logistic  
6  
7 growth considers that the prevalence of the exposure would reach a future steady state, while  
8  
9 multinomial logistic regression predicts that the past exposure observed trend would continue  
10  
11 relatively unchanged into the future. Exponential /logarithmic curves are a compromise between  
12  
13 the logistic and multinomial approaches, and involve an assumption that the past trend would  
14  
15 continue, but at a slower pace. We projected exposure data for the combined population and for  
16  
17 males and females separately, for both national and provincial estimates, where the data allowed.  
18  
19  
20  
21

### 22 *Cancer Incidence Projections*

23  
24  
25 Cancer incidence frequencies and rates were projected by extrapolating past trends using  
26  
27 various statistical models. In the past, trends over age at diagnosis, year of diagnosis (period)  
28  
29 and/or year of birth (cohort) as well as hybrids of these models have been used. More recently,  
30  
31 the age-period-cohort<sup>36</sup> and the age-drift-period-cohort (Nordpred)<sup>37</sup> models have been widely  
32  
33 used. For the ComPARE study, the R package ‘Canproj’<sup>38</sup> was used to project cancer incidence  
34  
35 from 2012 to 2042. The package projects forward to a maximum of 30 years, which suited our  
36  
37 needs, based on the uncertainty surrounding cancer sites for which secondary or primary  
38  
39 prevention interventions were being scaled up (e.g., colorectal, breast, lung, and cervical  
40  
41 cancers) or reduced (e.g., prostate cancer).  
42  
43  
44  
45  
46

47 Canproj combines cancer projection methods that have been used in the last 30 years to  
48  
49 select the best fitted model for the data, using a decision algorithm to identify the most  
50  
51 appropriate projection (Supplementary Figure 1). The models available in Canproj include: age-  
52  
53 only, age-period (including common trend and age-specific trend), age-cohort and Nordpred<sup>37</sup>  
54  
55 (age-drift-period-cohort; negative-binomial distribution may replace the Poisson distribution  
56  
57  
58  
59  
60

1  
2  
3 when over-dispersion appears). All models provide projected age-specific incidence rates and  
4 counts. Through the decision algorithm the Canproj methods produce more realistic projection  
5 estimates than other approaches, such as the Poisson regression method<sup>39</sup>, the polynomial  
6 regression and natural spline methods<sup>40</sup>, the joinpoint method<sup>41</sup> and the Bayesian Markov Chain  
7 Monte Carlo methods<sup>42</sup> by taking advantage of specific aspects of all of these methods to fit the  
8 best model. We evaluated all findings, independently of goodness-of-fit, to inspect the face  
9 validity of the projections.  
10  
11  
12  
13  
14  
15  
16  
17  
18  
19

### 20 *Defining Counterfactual Scenarios*

21  
22  
23 Within our avoidable cancers (PIF) framework we examined a range of exposure prevalence  
24 reduction scenarios – or counterfactuals. Our primary counterfactuals were based on population-  
25 based interventions which have been shown to be beneficial in experimental studies, and which  
26 could be scaled up to the population level. We conducted a systematic literature search of  
27 interventions for each exposure and identified their effects from reviews, meta-analyses or large  
28 intervention (individual and/or community level) trials. For all exposures, we also included  
29 models with fixed prevalence reductions of 10%, 25%, 50% and 100% for every year between  
30 2018 and 2042.  
31  
32  
33  
34  
35  
36  
37  
38  
39  
40  
41

### 42 *Potential Impact Fraction Estimation – Defining Latency of Interventions*

43  
44  
45 Using projected exposure prevalence, cancer incidence and a range of counterfactual scenarios,  
46 we then estimated the proportions and numbers of avoidable cancers in Canada from 2018 to  
47 2042. To present these results, we plotted the number of projected cancers under the baseline  
48 projection scenario (if no change in exposure prevalence were to occur), followed by the  
49 incidence estimated under a range of counterfactual scenarios.  
50  
51  
52  
53  
54  
55  
56  
57  
58  
59  
60

1  
2  
3 To evaluate the assumed fixed latency period, we conducted sensitivity analyses using  
4 some other assumptions for the statistical distribution of latency periods, e.g., including the  
5 uniform, modified Weibull and binomial distributions. These alternative distributions were each  
6  
7 chosen to have a mean of 10 years and range from 0 to 15 years. Incorporating a distribution of  
8  
9 latency periods into PIF estimation allowed us to better predict the transitional effect of  
10  
11 counterfactual interventions.  
12  
13  
14  
15

### 16 17 18 *Consideration of Multiple Risk Factors and Joint Effects*

19  
20  
21 As with other burden estimation efforts, our primary analyses were focused on the attributable  
22  
23 and avoidable proportions and numbers of cancers related to individual exposures separately  
24  
25 This approach is an oversimplification because several exposures might be known to have joint  
26  
27 impact/interactions on cancer risk. Several well-characterized examples include alcohol and  
28  
29 tobacco for various cancer sites<sup>43</sup>, and overweight/obesity and physical inactivity for colorectal  
30  
31 cancer.<sup>44</sup> Where possible we have also estimated the impact of multiple risk factors for a series  
32  
33 of scenarios where the scientific literature has suggested the existence of combined or synergistic  
34  
35 effects. When exposures are strongly associated and/or their interaction on cancer risk departs  
36  
37 from multiplicative risk, Levin's formula to estimate PAR of individual risk factors must be used  
38  
39 with caution.. We also compared different approaches for estimating the combined PARs for  
40  
41 multiple risk factors. For example, under certain situations, summing the PARs for each  
42  
43 exposure can give an approximate estimate of their combined PAR. Details regarding these  
44  
45 methods are presented in a separate publication (Ruan, 2017).  
46  
47  
48  
49  
50

### 51 *Sensitivity analyses*

52  
53  
54 Our sensitivity analyses sought to characterize potential bias in the available prevalence and risk  
55  
56 data. Since we relied on data from self-report questionnaires for some exposures, such as  
57  
58  
59  
60

1  
2  
3 alcohol, physical activity, and body weight, we expected a certain degree of misreporting. In our  
4  
5 sensitivity analyses, we corrected the reported prevalence by using studies that had validated the  
6  
7 survey data, based on small samples of objective measurements, and then using sex-specific  
8  
9 correction factors. Some exposures had considerable (>10%) non-response rates (i.e. responded  
10  
11 ‘don’t know’ or ‘refuse to answer’), and for these cases in our main analysis, we assumed that  
12  
13 non-responders had been unexposed to the risk factors in question. In the sensitivity analyses, we  
14  
15 imputed exposure values using both missing-at-random and missing-not-at-random assumptions.  
16  
17 For the missing-at-random scenario, we assumed that non-response was unrelated to the  
18  
19 exposure status, and hence that the exposure distribution among non-responders was identical to  
20  
21 that of responders. For the missing-not-at-random scenario, we assumed that the non-responders  
22  
23 were all exposed, and that their exposure distribution was identical to the exposed survey  
24  
25 responders.  
26  
27  
28  
29

## 30 31 **DISCUSSION**

32  
33  
34 In the ComPARE Study, we developed approaches for each step of data collection,  
35  
36 analysis, uncertainty estimation, and sensitivity analyses, in order to arrive at plausible PAR  
37  
38 estimates for cancer incidence. Furthermore, this approach provides a methodologically rigorous  
39  
40 framework for long-term projections of cancer burden and the relative impacts of different  
41  
42 population-based interventions for cancer prevention. As new cancer risk factor prevention  
43  
44 strategies are developed, their subsequent impact on the future cancer burden can easily be  
45  
46 integrated into this project for a comparative analysis of intervention strategies.  
47  
48  
49

50  
51 The estimates from this project will be relevant to a broad audience, ranging from those  
52  
53 working in cancer prevention and more broadly in health promotion, to cancer advocacy groups,  
54  
55 public health and healthcare planners, health policy makers, clinicians and the public to inform  
56  
57  
58  
59



1  
2  
3 priority setting in prevention programming and resources; allocation of funding to areas of unmet  
4 need; etc. We have developed this project in collaboration with our knowledge translation  
5 partner – the Canadian Cancer Society (CCS). As a primary end-user of the data generated from  
6 this project, CCS's input into the design and desired output of the project has been invaluable.  
7  
8 We encourage other groups to plan knowledge translation via similar partnership arrangements  
9 from the initiation phase of the project.  
10  
11

### 12 *Methodologic Extensions*

13  
14  
15  
16  
17  
18  
19  
20  
21 During this project we encountered several methodologic components that were  
22 comparatively under-developed. For example, while several groups have conducted large  
23 attributable risk estimation projects, few, if any, have systematically assessed the impact of  
24 multiple risk factors. Our examination of approaches for multiple risk factors adds to the  
25 literature and provides validation of the estimates produced in this project. In addition, we have  
26 considered projections of both the exposure prevalence and cancer incidence data with multiple  
27 approaches. Previous projects have assumed fixed cancer incidence or exposure prevalence for  
28 future projections, both are unrealistic. Furthermore, in the application of our counterfactual  
29 scenarios, we tested and applied several lag time models to fit the most likely windows of  
30 exposure and their associated subsequent changes in cancer incidence. In addition, we have  
31 worked in collaboration with key knowledge end-users to develop counterfactual scenarios that  
32 best match realistic expectations for cancer prevention programs.  
33  
34  
35  
36  
37  
38  
39  
40  
41  
42  
43  
44  
45  
46  
47  
48

### 49 *Limitations*

50  
51  
52 Our framework, while building on previous approaches, has a number of limitations.  
53 Long-term projections of exposure prevalence and cancer incidence are statistically challenging  
54 and involve a great deal of uncertainty. Although we have strived to identify the highest quality  
55  
56  
57  
58  
59  
60

1  
2  
3 exposure prevalence and cancer incidence datasets, and used methodologically sound approaches  
4  
5 for modelling, our results still need to be interpreted with caution. The resulting projections are a  
6  
7 direct product of the validity of the input data on exposure prevalence and associated relative  
8  
9 risks. Using data of poor quality or having questionable validity may result in erroneous  
10  
11 projections. For this reason, we included population-based, nationally-representative surveys to  
12  
13 estimate exposure prevalence when they were available. Many of our exposure measures,  
14  
15 particularly for the lifestyle risk/protective factors, were based on self-reported data. Where  
16  
17 possible, we modelled the potential impact of reporting biases on our estimates and included  
18  
19 analyses focused on directly measured exposures. For several infectious agents including  
20  
21 Epstein-Barr virus, *Helicobacter pylori* and human papillomavirus, large-population-based  
22  
23 estimates of prevalence were not available for Canada. For these instances, we included case  
24  
25 series, case-control, and cohort studies, as well as population-based surveys extracted from  
26  
27 populations from the United States and if not available, then Western Europe. For *Helicobacter*  
28  
29 *pylori*, we corrected the measurement error present in relative risk estimates on the basis of a  
30  
31 more sensitive assay to measure seroprevalence.  
32  
33  
34  
35  
36  
37

38  
39 In terms of cancer incidence projections, we relied on the Canproj program<sup>38</sup>, which uses  
40  
41 age-period-cohort models and the extension of the Nordpred model that has been widely used by  
42  
43 other research groups for long-term projections of cancer incidence. However, errors in  
44  
45 estimates are inevitable when projecting 30 years in the future as the models do not account for  
46  
47 future changes in risk factors (i.e. population changes in smoking patterns, diet, etc.). The  
48  
49 Canadian Cancer Registry is a high-quality database with good case ascertainment of malignant  
50  
51 tumours. Very few incident cancer cases are missed in the CCR and therefore any bias would be  
52  
53 minimal and would not affect our results.<sup>32</sup> However, data for the province of Quebec were  
54  
55  
56  
57  
58  
59  
60

1  
2  
3 extrapolated from 2010, as data for 2012 were not available, which is a limitation for the national  
4  
5 counts.  
6  
7

### 8 *Conclusions* 9

10  
11 We have described a methodologic framework for attributable risk estimation and cancer  
12  
13 projection that extends our previous research in PAR and PIFs. The application of this  
14  
15 framework will provide estimates of both current attributable and future avoidable disease risk in  
16  
17 Canada. These findings will be of use to those working in cancer prevention, public health and  
18  
19 healthcare planners, health policy makers, healthcare providers and the general public for a wide  
20  
21 range of applications in cancer control and prevention.  
22  
23  
24  
25  
26  
27  
28  
29  
30  
31  
32  
33  
34  
35  
36  
37  
38  
39  
40  
41  
42  
43  
44  
45  
46  
47  
48  
49  
50  
51  
52  
53  
54  
55  
56  
57  
58  
59  
60

### **Competing Interests**

We have read and understood the BMJ Group policy on declaration of interests and declare no competing interests.

### **Contributor Statement**

D.R.B, C.M.F., S.D.W., W.D.K, E.L.F., P.D., P.J.V., R.N., and P.De. were responsible for the study conception. D.R.B., A.E.P., S.D.W., W.D.K., E.L.F., P.D., P.J.V., Y.R., F.K., X.G., R.N, L.S., P.De., K.V., D.O., P.H, C.M.F. contributed substantially to the study design. D.R.B, A.E.P. and Y.R. drafted the manuscript. D.R.B., A.E.P., S.D.W., W.D.K., E.L.F., P.D., P.J.V., Y.R., F.K., X.G., R.N, L.S., P.De., K.V., D.O., P.H, C.M.F. revised the draft paper, gave final approval of this version to be accountable for all aspects of the work in ensuring that questions related to the accuracy or integrity of any part of the work are appropriately investigated and resolved.

### **Licence to BMJ Publishing Group Limited**

I Darren Brenner, The Corresponding Author of this article contained within the original manuscript which includes any diagrams & photographs within and any related or stand-alone film submitted has the right to grant on behalf of all authors and does grant on behalf of all authors, a licence to the BMJ Publishing Group Ltd and its licencees, to permit this Contribution (if accepted) to be published in the BMJ Open and any other BMJ Group products and to exploit all subsidiary rights.

### **Transparency Declaration**

Darren Brenner affirms that this manuscript is an honest, accurate, and transparent account of the study being reported; that no important aspects of the study have been omitted; and that any discrepancies from the study as planned (and, if relevant, registered) have been explained.

### **Funding**

This research is supported by a Canadian Cancer Society Research Institute Partner Prevention Research Grant (#703106).

## References

1. Canadian Cancer Society's Advisory Committee on Cancer Statistics. Canadian Cancer Statistics 2015. Special topic: Predictions of the future burden of cancer in Canada. Toronto, Ontario: Canadian Cancer Society, 2015.
2. Xie L, Semenciw R, Mery L. Cancer incidence in Canada: trends and projections (1983-2032). *Health promotion and chronic disease prevention in Canada : research, policy and practice* 2015;35 Suppl 1:2-186. [published Online First: 2015/05/27]
3. Bray F, Moller B. Predicting the future burden of cancer. *Nat Rev Cancer* 2006;6(1):63-74.
4. Chen J, Moir D, Whyte J. Canadian population risk of radon induced lung cancer: a re-assessment based on the recent cross-Canada radon survey. *Radiation protection dosimetry* 2012;152(1-3):9-13. doi: 10.1093/rpd/ncs147 [published Online First: 2012/08/10]
5. Al-Arydah M. Population attributable risk associated with lung cancer induced by residential radon in Canada: Sensitivity to relative risk model and radon probability density function choices: In memory of Professor Jan M. Zielinski. *The Science of the total environment* 2017;596-597:331-41. doi: 10.1016/j.scitotenv.2017.04.067 [published Online First: 2017/04/25]
6. Krueger H, Turner D, Krueger J, et al. The economic benefits of risk factor reduction in Canada: tobacco smoking, excess weight and physical inactivity. *Canadian journal of public health = Revue canadienne de sante publique* 2014;105(1):e69-78. [published Online First: 2014/04/17]
7. Krueger H, Koot JM, Rasali DP, et al. Regional variations in the economic burden attributable to excess weight, physical inactivity and tobacco smoking across British Columbia. *Health promotion and chronic disease prevention in Canada : research, policy and practice* 2016;36(4):76-86. [published Online First: 2016/04/15]
8. Peterson E, Aker A, Kim J, et al. Lung cancer risk from radon in Ontario, Canada: how many lung cancers can we prevent? *Cancer causes & control : CCC* 2013;24(11):2013-20. doi: 10.1007/s10552-013-0278-x [published Online First: 2013/08/29]
9. Brenner DR, Grevers X, Grundy A, et al. Cancer incidence attributable to inadequate physical activity in Alberta, Canada in 2012. *CMAJ Open* 2016; Under review
10. Brenner DR, Grundy A, Poirier AE, et al. Cancer Incidence Attributable to Excess Body Weight in Alberta, Canada. *CMAJ Open* 2016; Submitted Manuscript

11. Grevers X, Grundy A, Poirier AE, et al. Cancer incidence attributable to the use of oral contraceptives and hormone therapy in Alberta in 2012. *CMAJ Open* 2016;4(4):E754-e59. doi: 10.9778/cmajo.20160046 [published Online First: 2016/12/27]
12. Grundy A, Poirier AE, Khandwala F, et al. Cancer incidence attributable to red and processed meat consumption in Alberta in 2012. *CMAJ Open* 2016;4(4):E768-e75. doi: 10.9778/cmajo.20160036 [published Online First: 2016/12/27]
13. Grundy A, Poirier AE, Khandwala F, et al. Cancer incidence attributable to insufficient fruit and vegetable consumption in Alberta in 2012. *CMAJ Open* 2016;4(4):E760-e67. doi: 10.9778/cmajo.20160037 [published Online First: 2016/12/27]
14. Grundy A, Poirier AE, Khandwala F, et al. Cancer incidence attributable to insufficient fibre consumption in Alberta in 2012. *CMAJ Open* 2017;5(1):E7-E13. doi: 10.9778/cmajo.20160043
15. Poirier AE, Grundy A, Khandwala F, et al. Cancer incidence attributable to tobacco in Alberta, Canada, in 2012. *CMAJ Open* 2016;4(4):E578-e87. doi: 10.9778/cmajo.20150069 [published Online First: 2016/12/27]
16. Kuhn R, Rothman DS, Turner S, et al. Beyond Attributable Burden: Estimating the Avoidable Burden of Disease Associated with Household Air Pollution. *PLOS ONE* 2016;11(3):e0149669. doi: 10.1371/journal.pone.0149669
17. Baade PD, Meng X, Sinclair C, et al. Estimating the future burden of cancers preventable by better diet and physical activity in Australia. *The Medical journal of Australia* 2012;196(5):337-40. [published Online First: 2012/03/22]
18. Pandeya N, Wilson LF, Webb PM, et al. Cancers in Australia in 2010 attributable to the consumption of alcohol. *Australian and New Zealand journal of public health* 2015;39(5):408-13. doi: 10.1111/1753-6405.12456
19. Kendall BJ, Wilson LF, Olsen CM, et al. Cancers in Australia in 2010 attributable to overweight and obesity. *Australian and New Zealand journal of public health* 2015;39(5):452-7. doi: 10.1111/1753-6405.12458 [published Online First: 2015/10/07]
20. Nagle CM, Wilson LF, Hughes MCB, et al. Cancers in Australia in 2010 attributable to the consumption of red and processed meat. *Australian and New Zealand journal of public health* 2015;39(5):429-33. doi: 10.1111/1753-6405.12450

- 1  
2  
3 21. Arnold M, Pandeya N, Byrnes G, et al. Global burden of cancer attributable to high body-mass index  
4 in 2012: a population-based study. *The Lancet Oncology* 2015;16(1):36-46. doi: 10.1016/S1470-  
5 2045(14)71123-4  
6  
7
- 8  
9 22. Whiteman DC, Webb PM, Green AC, et al. Cancers in Australia in 2010 attributable to modifiable  
10 factors: introduction and overview. *Australian and New Zealand journal of public health*  
11 2015;39(5):403-07. doi: 10.1111/1753-6405.12468  
12  
13
- 14 23. Mathers CD, Loncar D. Projections of global mortality and burden of disease from 2002 to 2030.  
15 *PLoS Med* 2006;3(11):e442. doi: 10.1371/journal.pmed.0030442 [published Online First:  
16 2006/11/30]  
17  
18
- 19 24. World Health Organization. Global health risks: mortality and burden of disease attributable to  
20 selected major risks: World Health Organization 2009.  
21  
22  
23
- 24 25. Parkin DM. 1. The fraction of cancer attributable to lifestyle and environmental factors in the UK in  
25 2010. *British journal of cancer* 2011;105(S2):S2-S5.  
26  
27
- 28 26. Barendregt JJ, Veerman JL. Categorical versus continuous risk factors and the calculation of potential  
29 impact fractions. *J Epidemiol Community Health* 2010;64(3):209-12. doi:  
30 10.1136/jech.2009.090274 [published Online First: 2009/08/21]  
31  
32  
33
- 34 27. Levin ML. The occurrence of lung cancer in man. *Acta - Unio Internationalis Contra Cancrum*  
35 1953;9(3):531-41. [published Online First: 1953/01/01]  
36  
37
- 38 28. Morgan SL, Winship C. Counterfactuals and causal inference: Cambridge University Press 2014.  
39  
40
- 41 29. Morgenstern H, Bursic ES. A method for using epidemiologic data to estimate the potential impact of  
42 an intervention on the health status of a target population. *Journal of community health*  
43 1982;7(4):292-309. [published Online First: 1982/01/01]  
44  
45  
46
- 47 30. World Cancer Research Fund / American Institute for Cancer Research. Food, Nutrition, Physical  
48 Activity, and the Prevention of Cancer: a Global Perspective. Washington, D.C: American  
49 Institute for Cancer Research, 2007.  
50  
51
- 52 31. International Agency for Reseach on Cancer. IARC Monographs on the Evaluation of Carcinogenic  
53 Risks to Humans Lyon, France2017 [Available from: <http://monographs.iarc.fr/> accessed June 29  
54 2017.  
55  
56  
57  
58  
59  
60

- 1  
2  
3 32. Statistics Canada. Canadian Cancer Registry (CCR) Ottawa, ON: Statistics Canada; 2014 [Available  
4 from: <http://www23.statcan.gc.ca/imdb/p2SV.pl?Function=getSurvey&Id=329031> accessed April  
5 27 2017.  
6  
7  
8  
9 33. Greenland S. Interval estimation by simulation as an alternative to and extension of confidence  
10 intervals. *Int J Epidemiol* 2004;33(6):1389-97. doi: 10.1093/ije/dyh276 [published Online First:  
11 2004/08/21]  
12  
13  
14 34. Lee IM, Shiroma EJ, Lobelo F, et al. Effect of physical inactivity on major non-communicable  
15 diseases worldwide: an analysis of burden of disease and life expectancy. *The Lancet*  
16 2012;380(9838):219-29. doi: 10.1016/S0140-6736(12)61031-9  
17  
18  
19  
20 35. Renehan AG, Soerjomataram I, Tyson M, et al. Incident cancer burden attributable to excess body  
21 mass index in 30 European countries. *International journal of cancer Journal international du*  
22 *cancer* 2010;126(3):692-702. doi: 10.1002/ijc.24803 [published Online First: 2009/08/01]  
23  
24  
25  
26 36. Clayton D, Schifflers E. Models for temporal variation in cancer rates. II: age-period-cohort models.  
27 *Stat Med* 1987;6:469-81.  
28  
29  
30 37. Moller B. Prediction of cancer incidence in the Nordic countries up to the year 2020. *Eur J Cancer*  
31 *Prev* 2002;11(Suppl.):S1-S96.  
32  
33  
34 38. Qiu Z, Hatcher J, Team C-PW. Canproj—The R package of cancer projection methods based on  
35 generalized linear models for age, period, and/or cohort. *Technique Report for Cancer*  
36 *Projections Network (C-Proj) Alberta: Alberta Health Services* 2011  
37  
38  
39  
40 39. Dyba T, Hakulinen T, Paivarinta L. A simple non-linear model in incidence prediction. *Statist Med*  
41 1997;16:2297-309.  
42  
43  
44 40. Carstensen B. Age-period-cohort models for the Lexis diagram. *Statistics in medicine*  
45 2007;26(15):3018-45. doi: 10.1002/sim.2764 [published Online First: 2006/12/21]  
46  
47  
48 41. Kim HJ, Fay MP, Feuer EJ, et al. Permutation tests for joinpoint regression with applications to  
49 cancer rates. *Statistics in medicine* 2000;19(3):335-51. [published Online First: 2000/01/29]  
50  
51  
52 42. Bray I. Application of Markov chain Monte Carlo methods to projecting cancer incidence and  
53 mortality. *Journal of the Royal Statistical Society: Series C (Applied Statistics)* 2002;51(2):151-  
54 64. doi: 10.1111/1467-9876.00260  
55  
56  
57  
58  
59  
60



- 1  
2  
3 43. Hart CL, Davey Smith G, Gruer L, et al. The combined effect of smoking tobacco and drinking  
4 alcohol on cause-specific mortality: a 30 year cohort study. *BMC public health* 2010;10(1):789.  
5 doi: 10.1186/1471-2458-10-789  
6  
7  
8  
9 44. Samad AKA, Taylor RS, Marshall T, et al. A meta-analysis of the association of physical activity  
10 with reduced risk of colorectal cancer. *Colorectal Disease* 2005;7(3):204-13. doi: 10.1111/j.1463-  
11 1318.2005.00747.x  
12  
13  
14 45. Elm Ev, Altman DG, Egger M, et al. Strengthening the reporting of observational studies in  
15 epidemiology (STROBE) statement: guidelines for reporting observational studies. *BMJ*  
16 2007;335(7624):806-08. doi: 10.1136/bmj.39335.541782.AD  
17  
18  
19  
20 46. Stroup DF, Berlin JA, Morton SC, et al. Meta-analysis of observational studies in epidemiology: A  
21 proposal for reporting. *Jama* 2000;283(15):2008-12. doi: 10.1001/jama.283.15.2008  
22  
23  
24  
25  
26  
27  
28  
29  
30  
31  
32  
33  
34  
35  
36  
37  
38  
39  
40  
41  
42  
43  
44  
45  
46  
47  
48  
49  
50  
51  
52  
53  
54  
55  
56  
57  
58  
59  
60

## List of Tables and Figures with Captions

Table 1. The population attributable risk estimation methods employed for the individual exposures of interest in the ComPARE project.

Figure 1. Scope of project framework for estimation of current attributable and future avoidable disease burden. CHMS=Canadian Health Measures Survey, CCHS=Canadian Community Health Survey, Canadian, IARC=International Agency for Research on Cancer, WCRF=World Cancer Research Fund, CUP=Continuous Update Project, PIF=Potential Impact Fraction, PAR Population Attributable Risk

Figure 2. The process flow used for selecting risk estimates used in the ComPARE project. \*Quality determined using STrengthening the Reporting of OBservational studies in Epidemiology (STROBE)<sup>45</sup> guidelines for cohort and case-control studies and Meta-analysis Of Observational Studies in Epidemiology (MOOSE)<sup>46</sup> guidelines for meta-analysis

Figure 3. Representation of relevant exposure windows and latency onset considered for the ComPARE project.

Supplementary Table 1. Exposure and cancer site associations included in the ComPARE project

Supplementary Figure 1. Decision tree for cancer incidence projection model selection in Canproj.AC= Age-cohort model, AdPC= Age-drift-period-cohort model, Hybrid=age-only model or age-period model

\*Adapted from: *Canproj-The R package of cancer projection methods based on generalized linear models for age, period and/or cohort. Alberta Health Services: 2011-12-16.*

**Table 1.** The population attributable risk estimation methods employed for the individual exposures of interest in the ComPARE project.

| Formula for PAR Estimation                                                                                                                                                                                            | Exposure                                                                                                                                                                                                                                                                                                                                                                                           |
|-----------------------------------------------------------------------------------------------------------------------------------------------------------------------------------------------------------------------|----------------------------------------------------------------------------------------------------------------------------------------------------------------------------------------------------------------------------------------------------------------------------------------------------------------------------------------------------------------------------------------------------|
| <p><i>Formula 1: <math>PAR = \frac{Pe (RR - 1)}{1 + [Pe (RR - 1)]}</math></i></p>                                                                                                                                     | <ul style="list-style-type: none"> <li>• Tobacco (second-hand smoke)</li> <li>• UVR risk behaviours</li> <li>• Disinfection by-products</li> <li>• Low vitamin D</li> <li>• Low dietary calcium intake</li> <li>• <i>Helicobacter pylori</i></li> <li>• Hepatitis B</li> <li>• Hepatitis C</li> </ul>                                                                                              |
| <p><i>Formula 2: <math>PAR = P_c</math></i></p>                                                                                                                                                                       | <ul style="list-style-type: none"> <li>• Human papillomavirus</li> <li>• Epstein-Barr virus</li> <li>• Human T-cell lymphotropic virus type 1</li> <li>• Human herpesvirus 8</li> </ul>                                                                                                                                                                                                            |
| <p><i>Formula 3: <math>PAR = \frac{(p_{e1} \times ERR_1) + (P_{e2} \times ERR_2) + \dots + (P_{ex} \times ERR_x)}{1 + ((p_{e1} \times ERR_1) + (P_{e2} \times ERR_2) + \dots + (P_{ex} \times ERR_x))}</math></i></p> | <ul style="list-style-type: none"> <li>• Tobacco (active exposure)</li> <li>• Oral contraceptives</li> <li>• Hormone replacement therapy</li> <li>• Overweight/obesity</li> <li>• Insufficient fruit and vegetable intake</li> <li>• Red meat/processed meat intake</li> <li>• High alcohol intake</li> <li>• Insufficient dietary fibre intake</li> <li>• Physical activity/inactivity</li> </ul> |
| <p>Individualized Methods</p>                                                                                                                                                                                         | <ul style="list-style-type: none"> <li>• Overall UV exposure</li> <li>• Air pollution</li> <li>• Radon</li> <li>• Insufficient fruit and vegetable intake</li> <li>• Red meat/processed meat intake</li> <li>• Insufficient fibre intake</li> <li>• Alcohol consumption</li> </ul>                                                                                                                 |

ERR=excess relative risk, PAR=population attributable risk, Pe=prevalence of exposure in the population, RR=relative risk, UV=ultraviolet; UVR=ultraviolet radiation; P<sub>c</sub>= prevalence of exposure among cases

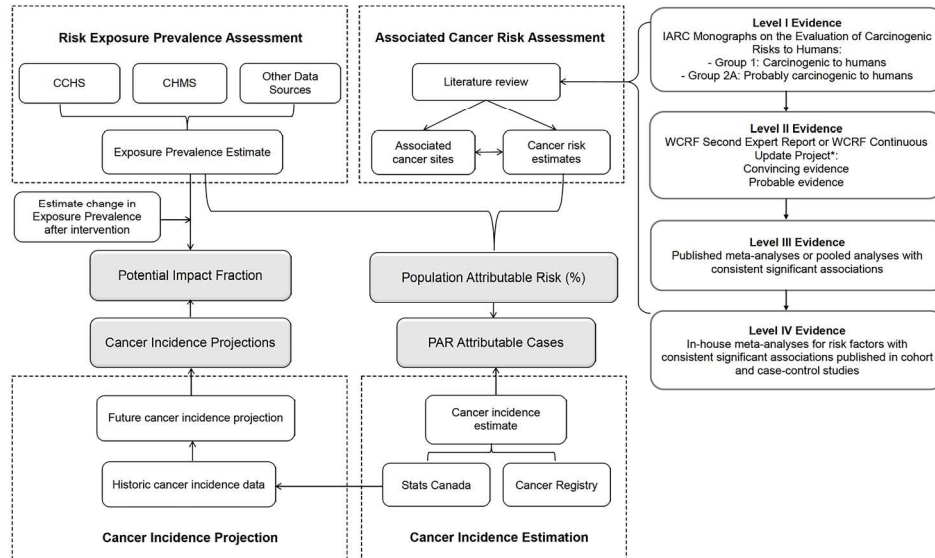

Figure 1. Scope of project framework for estimation of current attributable and future avoidable disease burden. CHMS=Canadian Health Measures Survey, CCHS=Canadian Community Health Survey, Canadian, IARC=International Agency for Research on Cancer, WCRF=World Cancer Research Fund, CUP=Continuous Update Project, PIF=Potential Impact Fraction, PAR Population Attributable Risk

279x215mm (300 x 300 DPI)

Only

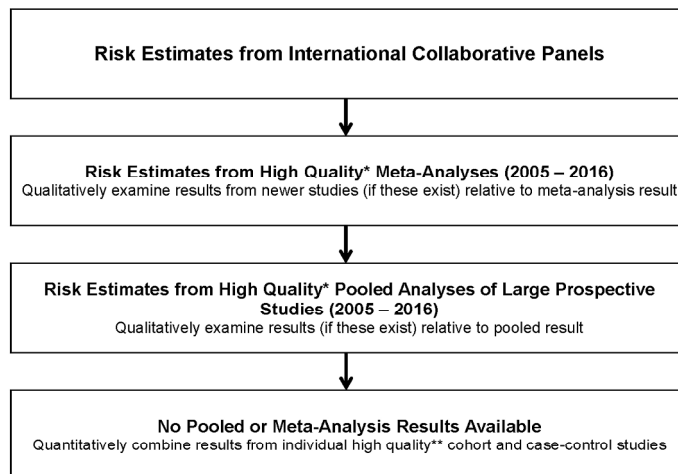

45 Figure 2. The process flow used for selecting risk estimates used in the ComPARE project.  
46 \*Quality determined using S**T**rengthening the Reporting of **O**bservational studies in Epidemiology  
47 (STROBE)<sup>45</sup> guidelines for cohort and case-control studies and Meta-analysis Of Observational Studies in  
48 Epidemiology (MOOSE)<sup>46</sup> guidelines for meta-analysis

49 279x431mm (300 x 300 DPI)

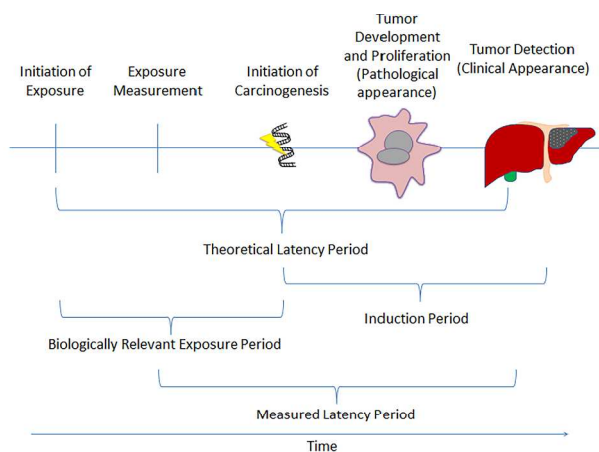

Figure 3. Representation of relevant exposure windows and latency onset considered for the ComPARE project.

279x452mm (300 x 300 DPI)

1  
2  
3  
4  
5  
6  
7  
8  
9  
10  
11  
12  
13  
14  
15  
16  
17  
18  
19  
20  
21  
22  
23  
24  
25  
26  
27  
28  
29  
30  
31  
32  
33  
34  
35  
36  
37  
38  
39  
40  
41  
42  
43  
44  
45  
46  
47

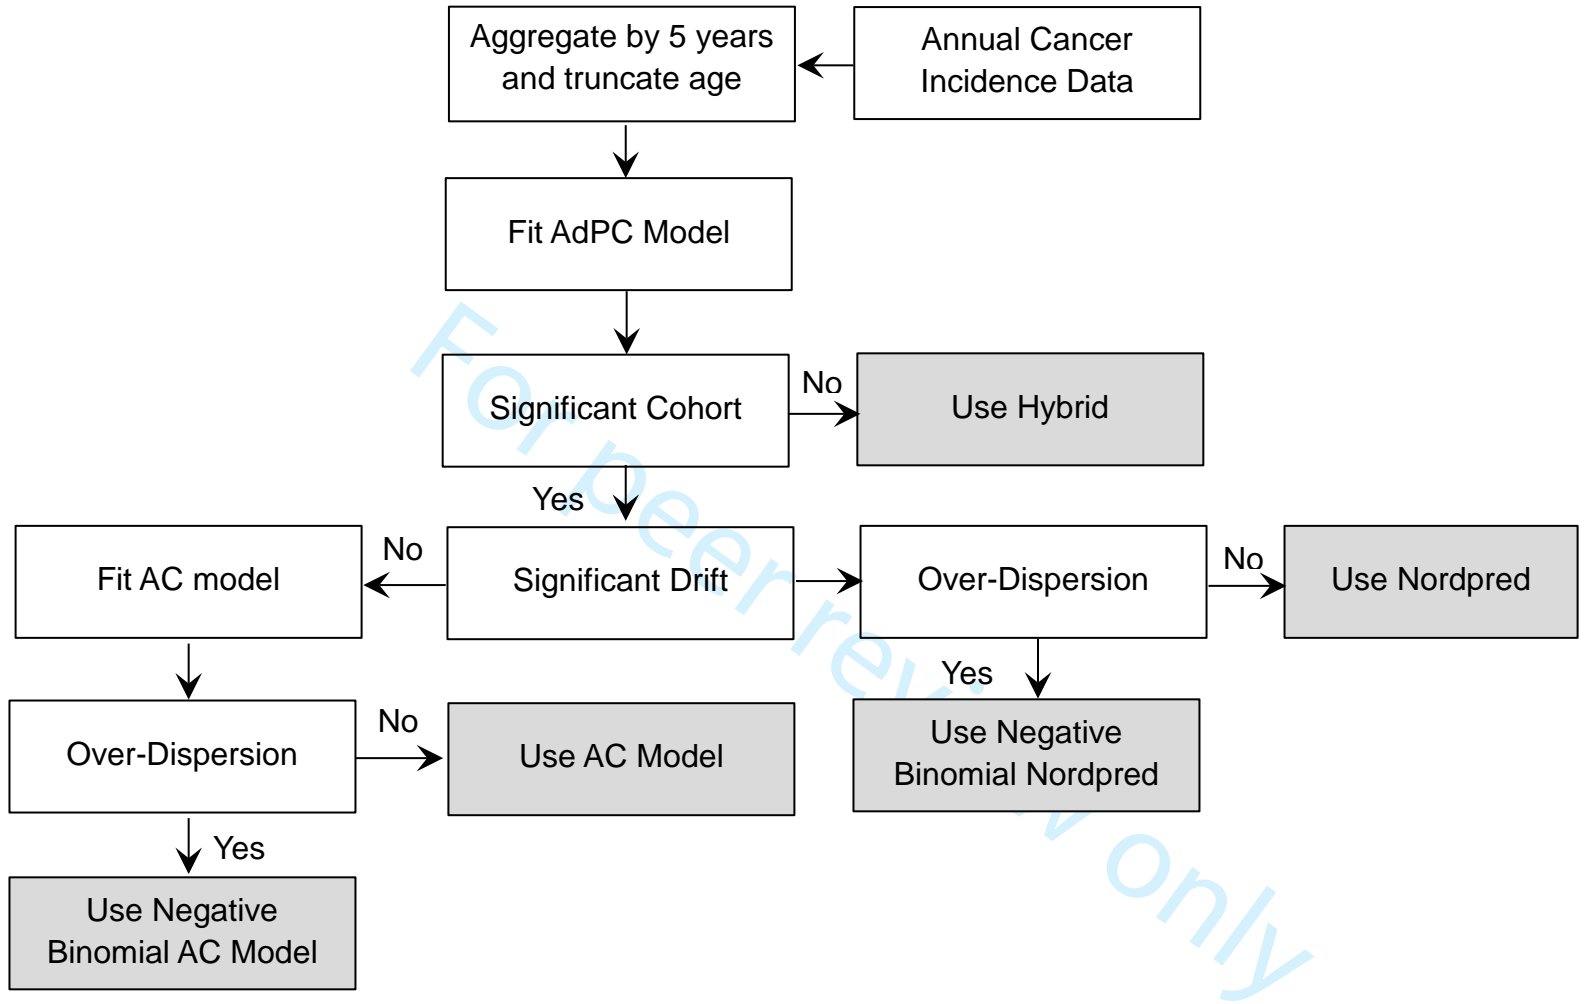

Supplementary Figure 1. Decision tree for cancer incidence projection model selection in Canproj.AC= Age-cohort model, AdPC= Age-drift-period-cohort model, Hybrid=age-only model or age-period model

\*Adapted from: *Canproj-The R package of cancer projection methods based on generalized linear models for age, period and/or cohort. Alberta Health Services: 2011-12-16.*

Supplementary Table 1. Exposure and Cancer Site Associations to be Included in the ComPARE project\*

| Cancer Site of Interest                  | Associated Modifiable Risk Factors                                                                                                                                                                                                                                                            |
|------------------------------------------|-----------------------------------------------------------------------------------------------------------------------------------------------------------------------------------------------------------------------------------------------------------------------------------------------|
| Lung                                     | Non-starchy vegetable intake<br>Fruit intake<br>Physical activity<br>Active tobacco smoking<br>Passive tobacco smoking<br>Air pollution<br>Radon<br>Arsenic                                                                                                                                   |
| Breast                                   | Oral contraceptives<br>Hormone replacement therapy<br>Insufficient fruit<br>Alcohol<br>Red meat<br>Processed meat<br>Insufficient vitamin D<br>Overweight/Obesity<br>Physical inactivity<br>Sedentary behavior<br>Abdominal obesity                                                           |
| Colorectal Cancer                        | Insufficient fruit<br>Insufficient non-starchy vegetables<br>Alcohol<br>Red meat intake<br>Processed meat intake<br>Fiber intake<br>Insufficient vitamin D<br>Insufficient calcium<br>Overweight/Obesity<br>Physical inactivity<br>Sedentary behavior<br>Abdominal obesity<br>Tobacco smoking |
| Gastric cancer,<br>Gastric cardia cancer | Insufficient fruit<br>Alcohol<br>Red meat<br>Processed meat<br>Insufficient fibre<br>Overweight/Obesity<br>Tobacco smoking<br><i>Helicobacter pylori</i> (non-cardia only)                                                                                                                    |
| Oesophagus Cancer                        | Overweight/Obesity<br>Physical inactivity<br>Tobacco smoking<br>Alcohol<br>Insufficient non-starchy vegetables<br>Insufficient fruit<br>Processed meat                                                                                                                                        |



|                                 |                                                                                                                                                                                                     |
|---------------------------------|-----------------------------------------------------------------------------------------------------------------------------------------------------------------------------------------------------|
| Bladder Cancer                  | <p>Insufficient non-starchy vegetables</p> <p>Insufficient fruit</p> <p>Physical inactivity</p> <p>Tobacco smoking</p> <p>Insufficient vitamin D</p> <p>Arsenic</p> <p>Disinfection by-products</p> |
| Pancreas Cancer                 | <p>Insufficient non-starchy vegetables</p> <p>Insufficient fruit</p> <p>Alcohol</p> <p>Red meat</p> <p>Processed meat</p> <p>Overweight/Obesity</p> <p>Abdominal obesity</p> <p>Tobacco smoking</p> |
| Endometrial Cancer              | <p>Oral contraceptives</p> <p>Hormone therapy</p> <p>Overweight/Obesity</p> <p>Physical inactivity</p> <p>Sedentary behavior</p> <p>Abdominal obesity</p>                                           |
| Oral Cancer / Oropharynx Cancer | <p>Insufficient non-starchy vegetables</p> <p>Tobacco smoking</p> <p>Human papillomavirus (HPV)</p>                                                                                                 |
| Liver Cancer                    | <p>Insufficient non-starchy vegetables</p> <p>Alcohol</p> <p>Overweight/Obesity</p> <p>Physical inactivity</p> <p>Tobacco smoking</p> <p>Hepatitis B virus (HBV)</p> <p>Hepatitis C virus (HCV)</p> |
| Ovarian Cancer                  | <p>Oral contraceptives</p> <p>Hormone Replacement therapy</p> <p>Insufficient non-starchy vegetables</p> <p>Overweight/Obesity</p> <p>Sedentary behavior</p> <p>Tobacco smoking</p>                 |
| Larynx Cancer                   | <p>Alcohol</p> <p>Insufficient non-starchy vegetables</p> <p>Tobacco smoking</p> <p>Human papillomavirus (HPV)</p>                                                                                  |
| Cervical Cancer                 | <p>Tobacco smoking</p> <p>Passive (second-hand) tobacco smoking</p> <p>Human papillomavirus (HPV)</p>                                                                                               |
| Prostate Cancer                 | <p>Overweight/Obesity</p> <p>Abdominal obesity</p>                                                                                                                                                  |
| Kidney Cancer                   | <p>Overweight/Obesity</p> <p>Abdominal obesity</p> <p>Physical inactivity</p> <p>Tobacco smoking</p> <p>Vitamin D</p>                                                                               |

|                                            |                                                                                                                   |
|--------------------------------------------|-------------------------------------------------------------------------------------------------------------------|
| Gallbladder Cancer                         | Tobacco smoking<br>Overweight/Obesity                                                                             |
| Melanoma                                   | Ultraviolet radiation (indoor tanning, sunburn, sunbathing, total exposure)                                       |
| Hodgkin Lymphoma                           | Epstein-Barr Virus (EBV)                                                                                          |
| Non-Hodgkin Lymphoma                       | Physical inactivity<br>Epstein-Barr Virus (EBV)(immuno-suppressed only)<br>Hepatitis C virus (HCV)                |
| Non-Melanoma Skin Cancer                   | Human Immunodeficiency virus (HIV)<br>Ultraviolet radiation (indoor tanning, sunburn, sunbathing, total exposure) |
| Nasopharyngeal Cancer                      | Epstein-Barr Virus (EBV)                                                                                          |
| Pharynx Cancer                             | HPV                                                                                                               |
| Thyroid Cancer                             | Overweight/Obesity<br>Abdominal Obesity                                                                           |
| Anal Cancer                                | Human papillomavirus (HPV)                                                                                        |
| Cholangiocarcinoma                         | Hepatitis B virus (HBV)<br>Hepatitis C virus (HCV)                                                                |
| Leukemia                                   | Human T-cell lymphotropic virus type 1 (HTLV-1)                                                                   |
| Burkitt Lymphoma                           | Epstein-Barr Virus (EBV)                                                                                          |
| Eye Cancer                                 | UV radiation                                                                                                      |
| Kaposi Sarcoma                             | Human herpesvirus 8                                                                                               |
| Lip Cancer                                 | UV radiation (indoor tanning, sunburn, sunbathing, total exposure)                                                |
| Extranodal NK/T cell lymphoma – nasal type | Epstein-Barr Virus (EBV)                                                                                          |
| Mesothelioma                               | Asbestos                                                                                                          |
| Penile Cancer                              | Human papillomavirus (HPV)                                                                                        |
| Tonsil Cancer                              | Human papillomavirus (HPV)                                                                                        |
| Vaginal Cancer                             | Human papillomavirus (HPV)                                                                                        |
| Vulvar Cancer                              | Human papillomavirus (HPV)                                                                                        |

\*inclusion of exposure and cancer site associations were based on hierarchy of evidence collected from the International Agency for Research on Cancer monograph series, World Cancer Research Fund (WCRF) Second Expert Report, WCRF Continuous Update Projects and published meta-analyses of epidemiologic studies.

# BMJ Open

## Estimating the Current and Future Cancer Burden in Canada: Methodologic Framework of the Canadian Population Attributable Risk of Cancer (ComPARE) Study

|                                 |                                                                                                                                                                                                                                                                                                                                                                                                                                                                                                                                                                                                                                                                                                                                                                                                                                                                                                                                                                                                                                                                                                                                                                                                                                                                                                                                                                                                                                                                                                                                                                                                                                     |
|---------------------------------|-------------------------------------------------------------------------------------------------------------------------------------------------------------------------------------------------------------------------------------------------------------------------------------------------------------------------------------------------------------------------------------------------------------------------------------------------------------------------------------------------------------------------------------------------------------------------------------------------------------------------------------------------------------------------------------------------------------------------------------------------------------------------------------------------------------------------------------------------------------------------------------------------------------------------------------------------------------------------------------------------------------------------------------------------------------------------------------------------------------------------------------------------------------------------------------------------------------------------------------------------------------------------------------------------------------------------------------------------------------------------------------------------------------------------------------------------------------------------------------------------------------------------------------------------------------------------------------------------------------------------------------|
| Journal:                        | <i>BMJ Open</i>                                                                                                                                                                                                                                                                                                                                                                                                                                                                                                                                                                                                                                                                                                                                                                                                                                                                                                                                                                                                                                                                                                                                                                                                                                                                                                                                                                                                                                                                                                                                                                                                                     |
| Manuscript ID                   | bmjopen-2018-022378.R1                                                                                                                                                                                                                                                                                                                                                                                                                                                                                                                                                                                                                                                                                                                                                                                                                                                                                                                                                                                                                                                                                                                                                                                                                                                                                                                                                                                                                                                                                                                                                                                                              |
| Article Type:                   | Protocol                                                                                                                                                                                                                                                                                                                                                                                                                                                                                                                                                                                                                                                                                                                                                                                                                                                                                                                                                                                                                                                                                                                                                                                                                                                                                                                                                                                                                                                                                                                                                                                                                            |
| Date Submitted by the Author:   | 01-Jun-2018                                                                                                                                                                                                                                                                                                                                                                                                                                                                                                                                                                                                                                                                                                                                                                                                                                                                                                                                                                                                                                                                                                                                                                                                                                                                                                                                                                                                                                                                                                                                                                                                                         |
| Complete List of Authors:       | <p>Brenner, Darren; University of Calgary Cumming School of Medicine, Oncology; Alberta Health Services, Cancer Epidemiology and Prevention Research</p> <p>Poirier, Abbey; Alberta Health Services, Cancer Epidemiology and Prevention Research</p> <p>Walter, Stephen ; McMaster University , Department of Health Research Methods, Evidence, and Impact</p> <p>King, Will; Queen's University, Department of Public Health Sciences</p> <p>Franco, Eduardo; McGill University, Department of Oncology; McGill University Department of Epidemiology Biostatistics and Occupational Health</p> <p>Demers, Paul; Cancer Care Ontario, Occupational Cancer Research Centre</p> <p>Villeneuve, Paul; Carleton University Department of Health Sciences</p> <p>Ruan, Yibing; Alberta Health Services, Cancer Epidemiology and Prevention Research</p> <p>Khandwala, Farah; Alberta Health Services, Cancer Epidemiology and Prevention Research</p> <p>Grevers, Xin; Alberta Health Services, Cancer Epidemiology and Prevention Research</p> <p>Nuttall, Robert; Health Quality Ontario</p> <p>Smith, Leah; Canadian Cancer Society</p> <p>De, Prithwish; Cancer Care Ontario</p> <p>Volesky, Karena; McGill University, Department of Oncology; McGill University Department of Epidemiology Biostatistics and Occupational Health</p> <p>O'Sullivan, Dylan; Queen's University, Department of Public Health Sciences</p> <p>Hystad, Perry ; Oregon State University</p> <p>Friedenreich, CM; Alberta Health Services, Cancer Epidemiology and Prevention Research; University of Calgary Cumming School of Medicine, Oncology</p> |
| <b>Primary Subject Heading</b>: | Epidemiology                                                                                                                                                                                                                                                                                                                                                                                                                                                                                                                                                                                                                                                                                                                                                                                                                                                                                                                                                                                                                                                                                                                                                                                                                                                                                                                                                                                                                                                                                                                                                                                                                        |
| Secondary Subject Heading:      | Public health, Oncology                                                                                                                                                                                                                                                                                                                                                                                                                                                                                                                                                                                                                                                                                                                                                                                                                                                                                                                                                                                                                                                                                                                                                                                                                                                                                                                                                                                                                                                                                                                                                                                                             |
| Keywords:                       | Epidemiology < ONCOLOGY, Potential impact fraction, Population attributable risk, Cancer, STATISTICS & RESEARCH METHODS, Risk factors                                                                                                                                                                                                                                                                                                                                                                                                                                                                                                                                                                                                                                                                                                                                                                                                                                                                                                                                                                                                                                                                                                                                                                                                                                                                                                                                                                                                                                                                                               |

1  
2  
3  
4  
5  
6  
7  
8  
9  
10  
11  
12  
13  
14  
15  
16  
17  
18  
19  
20  
21  
22  
23  
24  
25  
26  
27  
28  
29  
30  
31  
32  
33  
34  
35  
36  
37  
38  
39  
40  
41  
42  
43  
44  
45  
46  
47  
48  
49  
50  
51  
52  
53  
54  
55  
56  
57  
58  
59  
60

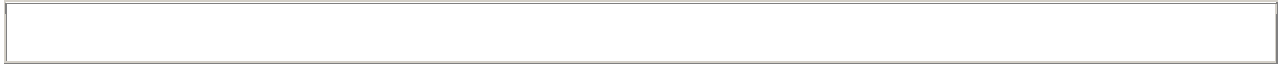

SCHOLARONE™  
Manuscripts

For peer review only

1  
2  
3 Estimating the Current and Future Cancer Burden in Canada: Methodologic Framework of the  
4 Canadian Population Attributable Risk of Cancer (ComPARE) Study  
5  
6  
7

8 Darren R. Brenner\*<sup>1,2</sup>, Abbey E. Poirier<sup>2</sup>, Stephen D. Walter<sup>3</sup>, Will D. King<sup>4</sup>, Eduardo L.  
9 Franco<sup>5,6</sup>, Paul Demers<sup>7</sup>, Paul J. Villeneuve<sup>8</sup>, Yibing Ruan<sup>2</sup>, Farah Khandwala<sup>2</sup>, Xin Grevers<sup>2</sup>,  
10 Robert Nuttall<sup>9</sup>, Leah Smith<sup>9</sup>, Prithwish De<sup>10</sup>, Karena Volesky<sup>5,6</sup>, Dylan O'Sullivan<sup>4</sup>, Perry  
11 Hystad<sup>11</sup>, Christine M. Friedenreich<sup>1,2</sup>, on behalf of the ComPARE Study Group<sup>12</sup>  
12  
13  
14  
15

- 16  
17 1. Departments of Oncology and Community Health Sciences, Cumming School of Medicine,  
18 University of Calgary, Calgary, Alberta, Canada  
19 2. Department of Cancer Epidemiology and Prevention Research, CancerControl Alberta,  
20 Alberta Health Services, Calgary, Alberta, Canada  
21 3. Department of Health Research Methods, Evidence, and Impact, McMaster University,  
22 Hamilton, Ontario, Canada  
23 4. Department of Public Health Sciences, Queen's University, Kingston, Ontario, Canada  
24 5. Department of Epidemiology, Biostatistics and Occupational Health, McGill University,  
25 Montréal, Québec, Canada  
26 6. Department of Oncology, McGill University, Montréal, Québec, Canada  
27 7. Occupational Cancer Research Centre, Toronto, Ontario, Canada  
28 8. Department of Health Sciences, Carleton University, Ottawa, Ontario, Canada  
29 9. Canadian Cancer Society, Toronto, Ontario, Canada  
30 10. Cancer Care Ontario, Toronto, Ontario, Canada  
31 11. College of Public Health and Human Sciences, Oregon State University, Corvallis, Oregon,  
32 United States  
33 12. Additional members of the ComPARE study group:  
34 Elizabeth Holmes<sup>9</sup>  
35 Zeinab El-Masri<sup>10</sup>  
36 Mariam El-Zein<sup>6</sup>  
37 Sheila Bouten<sup>6</sup>  
38 Tasha Narain<sup>4</sup>  
39 Priyanka Gogna<sup>4</sup>  
40  
41  
42  
43

44 \*To Whom Correspondence should be addressed:

45 Darren R. Brenner  
46 Department of Cancer Epidemiology and Prevention Research  
47 CancerControl Alberta, Alberta Health Services  
48 Holy Cross Centre – Room 513C  
49 Box ACB, 2210-2<sup>nd</sup> St. SW, Calgary, AB  
50 T2S 3C3  
51 Phone: 1-403-698-8178  
52 [Darren.Brenner@ucalgary.ca](mailto:Darren.Brenner@ucalgary.ca)  
53  
54  
55  
56  
57  
58  
59  
60

## ABSTRACT

**Introduction:** The Canadian Population Attributable Risk of Cancer (ComPARe) project will quantify the number and proportion of incident cancer cases in Canada, now and projected to 2042, that could be prevented through changes in the prevalence of modifiable exposures associated with cancer. The broad risk factor categories of interest include: tobacco, diet, energy imbalance, infectious diseases, hormonal therapies and environmental factors such as air pollution and residential radon.

**Methods and analysis:** Working as a national network, we will use population attributable risks (PAR) and potential impact fractions (PIF) to model both attributable (current) and avoidable (future) cancers. The latency periods and the temporal relationships between exposures and cancer diagnoses will be accounted for in the analyses. For PAR estimates, historical exposure prevalence data and the most recent provincial and national cancer incidence data will be used. For PIF estimates, we will model alternative or “counterfactual” distributions for cancer risk factor exposures to assess how cancer incidence could be reduced under different scenarios of population exposure, projecting incidence to 2042.

**Dissemination:** The framework provided can be readily extended and applied to other populations or jurisdictions outside of Canada. An embedded knowledge translation and exchange component of this study with our Canadian Cancer Society partners will ensure that these findings are translated to cancer programs and policies aimed at population-based cancer risk reduction strategies.

## STRENGTHS AND LIMITATIONS OF THIS STUDY

- We report a detailed and transparent approach for conducting large attributable risk estimation projects to assess the impact of multiple risk factors.
- We have considered projections of both the exposure prevalence and cancer incidence with multiple approaches, which is an improvement over unrealistic fixed projection models.
- Long-term projections of exposure prevalence and cancer incidence are statistically challenging and involve a great deal of uncertainty.
- Many of our exposure measures are based on self-reported data, which introduces the possibility of misreporting.

## BACKGROUND

Estimates of the current and future burden of cancer in Canada attributable to known and probable causes of cancer are required to allocate prevention resources optimally. National<sup>1 2</sup> and global cancer incidence projections<sup>3</sup> suggest that the burden of cancer will continue to rise. In Canada and other developed nations, this is largely attributable to growing and aging populations. In addition, despite established associations between modifiable risk factors and cancer risk, sufficient reductions in the prevalence of these risk factors have not been achieved in Canada.<sup>1-3</sup> Identifying exposures and interventions with the greatest potential impacts of reducing cancer risk will aid in implementing prevention programs and policies to combat this growing health challenge.

Several groups, including some members of our Canadian Burden of Cancer - Population Attributable Risk (ComPARE) Study Group, have produced estimates of the current burden of cancer attributable to lifestyle, environmental and infectious exposures in Canadian national<sup>4-6</sup> and provincial<sup>7-15</sup> populations. Additional studies have estimated the future avoidable national<sup>16-20</sup> and global<sup>21</sup> cancer burdens attributable to single exposures. However, population attributable risk (PAR) estimates are dependent on risk factor prevalence, which vary over time and are population specific. Therefore, it is important to frequently update PAR estimates. In addition, several methodologic extensions to these approaches, including modeling the combined impact of multiple risk factors and defining the timing of intervention impacts on subsequent cancer incidence are lacking. A comprehensive estimation of the current and future cancer burden and of the impact of potential reductions in exposure prevalence on cancer incidence at the population are needed.

For the ComPARE Study, we developed a methodological framework to estimate the burden of cancer in Canada using cancer incidence data (2015) and projected incidence trends



1  
2  
3 (2015-2042). The ComPARE study team brings together the substantive and quantitative  
4 expertise of cancer researchers from across the country. This collaborative, pan-Canadian study  
5 also involves a partnership with the Canadian Cancer Society, a main knowledge end user for  
6 this work, who worked in partnership with the researchers throughout this project. To ensure  
7 methods were rigorously applied and standardized across research labs, we developed a  
8 methodological framework for the estimation of current attributable and future avoidable cancers  
9 associated with modifiable risk factors. This framework extends the work of other groups<sup>22-29</sup>  
10 and is applicable to a range of diseases and populations. Here we describe the approach and  
11 methods used in the ComPARE Study. An overview of earlier methods used to estimate PARs  
12 and preventable impact fractions (PIFs) are presented. We then describe how we used these  
13 methods in the ComPARE Study, and the innovations that we developed to extend them. See  
14 Figure 1 for an outline of our approach.  
15  
16  
17  
18  
19  
20  
21  
22  
23  
24  
25  
26  
27  
28  
29  
30  
31  
32  
33  
34  
35  
36  
37  
38  
39  
40  
41  
42  
43  
44  
45  
46  
47  
48  
49  
50  
51  
52  
53  
54  
55  
56  
57  
58  
59  
60

## METHODS

Figure 1 shows the methodologic framework for the ComPARE study. The concept of PAR or population attributable fraction (PAF) was initially developed by Levin in 1953 to estimate the burden of disease in the general population attributable to a given factor.<sup>30</sup> Attributable risks are predicated on the assumption that there are causal relationships between exposures and disease outcomes, and on the concept of the counterfactual, a scenario counter to actual experience, where exposures to the causal agents no longer exist or can be mitigated.<sup>31</sup>

Since the initial concept of the PAR method was introduced, several statistical and theoretical extensions to the framework have included methods to measure the uncertainty around PARs and the development of the potential impact fraction (PIF). The PIF is an extension of the PAR to consider situations complete removal of the exposure cannot be assumed.<sup>32</sup> The impact of a reduction in the prevalence or population distribution of an exposure and the subsequent impact of an exposure reduction is examined. The PAR and PIF are statistical foundation of the ComPARE Study.

To apply the PAR and PIF to estimate the impacts of reducing exposures, three sources of data are essential (Table 1): 1) the relative risk of incident disease, or risk distribution associated with exposure; 2) the proportion of the population or cancer cases exposed to the risk or protective factor (sex and age-specific exposure prevalence); and 3) sex and age-specific disease incidence data. These three elements are needed to estimate the proportion of cancer cases that could be prevented, based on the PARs or PIFs. In the following sections, we present the methods used in the ComPARE Study for estimating the current attributable (PAR) and future avoidable (PIF) burdens of cancer.

### *Identifying Risk Factors for Inclusion*

1  
2  
3 A crucial component of attributable cancer estimation is determining which exposures should be  
4 included as causal for incident cancers. Given the considerable amount of epidemiologic and  
5 basic science literature evaluating etiologic associations for cancer, we needed criteria to  
6 determine the level of evidence required for inclusion in our analyses. We developed a hierarchy  
7 of evidence for the ComPARE Study (Figure 2) where quality determined using STrengthening  
8 the Reporting of OBServational studies in Epidemiology (STROBE)<sup>33</sup> guidelines for cohort and  
9 case-control studies and Meta-analysis Of Observational Studies in Epidemiology (MOOSE)<sup>34</sup>  
10 guidelines for meta-analysis. The World Cancer Research Fund's (WCRF) Continuous Update  
11 Project<sup>35</sup> and the International Agency for Research on Cancer's (IARC) [Monographs on the](#)  
12 [Evaluation of Carcinogenic Risks to Humans](#)<sup>36</sup> have devoted substantial resources, including  
13 expert panels, to classifying potentially carcinogenic risks to humans. We used the  
14 recommendations from these international and national panels as our first level of inclusion.  
15 IARC group 1 (carcinogenic to humans) and group 2A (probably carcinogenic to humans)  
16 carcinogens were included. As a second level of evidence, we included exposure/cancer site  
17 pairs where high quality meta-analyses of epidemiologic studies published since the WCRF and  
18 IARC reports demonstrated consistent associations, as well as IARC Group 2B exposures for  
19 sensitivity analyses. The exposure and cancer site associations included in the ComPARE Study  
20 are presented in Supplementary Table 1.

### 21 *Estimation of Attributable Cancers*

#### 22 *Exposure Prevalence Data – Including Latency*

23 The biologically relevant time period from initiation of an exposure to development of disease is  
24 highly variable, depending on the exposure and cancer site and it is likely to be measured in  
25 years or even decades for solid tumors. Therefore, we allowed for a period of latency from  
26 exposure to cancer incidence/diagnosis in our assessments. However, exposure prevalence data

1  
2  
3 were not always available for the long relevant time periods implied by latency. As a proxy  
4 measure for each exposure, we extracted the median or mean follow-up time from exposure  
5 measurement to cancer incidence from large cohort studies. Our assessment of quality of the  
6 cohort studies was evaluated based on their sample size, methods of exposure assessment and  
7 length of follow-up, where large cohorts with detailed exposure and longer follow-up were  
8 considered the highest quality. This information concerning the latency period was then  
9 compared with the time periods for which high-quality data on exposure prevalence were  
10 available. We selected prevalence estimates that corresponded to the midpoint of the range of  
11 potential latency periods, as identified from the cohort studies. When these data were not  
12 available, we assumed a 10-year latency period between exposure measurement and cancer  
13 incidence, or used the closest available prevalence estimates. We attempted to strike a pragmatic  
14 balance between selecting a biologically plausible and relevant period of time and feasibly  
15 collecting prevalence data. For example, for the infectious agents, the latency period was  
16 determined by the *availability* of prevalence data. For *H. pylori*, there was one seroprevalence  
17 survey in 1999-2000, and for HBV & HCV the prevalence data were collected from the  
18 Canadian Health Measures and the Canadian Notifiable Disease Surveillance System occurring  
19 from 2007-2012. A diagram of our approach to modelling relevant exposures is shown in Figure  
20 3.

21  
22  
23  
24  
25  
26  
27  
28  
29  
30  
31  
32  
33  
34  
35  
36  
37  
38  
39  
40  
41  
42  
43  
44  
45 To estimate the attributable burden of cancer due to past exposures in Canada, we  
46 developed a hierarchy to select prevalence data from Canadian national and region-specific data  
47 sources, where available. For lifestyle exposures we considered data from large Canadian cohort  
48 studies when data from national population-based surveys were not available. For several  
49 environmental exposures, environmental monitoring data from sites in various parts of Canada  
50  
51  
52  
53  
54  
55  
56  
57  
58  
59  
60

1  
2  
3 were used. We collected exposure prevalence data overall and, where the data allowed, by sex,  
4  
5 age and province.  
6

### 7 *Cancer Incidence Data*

8  
9  
10 We obtained cancer incidence data for those 18 years of age and older from the Canadian  
11  
12 Cancer Registry (CCR); a national registry of cancer cases covering the entire population of  
13  
14 Canada, including by province and territory. Statistics Canada produces annual data quality  
15  
16 reports for the CCR and each Canadian province and territory has a legislated responsibility for  
17  
18 cancer collection and control, which improves the completeness and population coverage of the  
19  
20 data<sup>37</sup>. Data by province, sex and five-year age group for 2012, being the most recent year of  
21  
22 national data available at the time of the study (except for Quebec data which were extrapolated  
23  
24 from 2010) were obtained. Cancer cases were coded in the CCR using the International  
25  
26 Classification of Diseases for Oncology, 3<sup>rd</sup> Edition (ICD-O-3). Cancer mortality was not  
27  
28 considered in this study as we were interested in cancer prevention through changes in  
29  
30 behaviours and exposures. Furthermore, the inclusion of survival requires an additional set of  
31  
32 modeling assumptions related to survival across exposures groups, where the evidence base is far  
33  
34 less developed.  
35  
36  
37  
38

### 39 *Estimation of Population Attributable Cancers – Including Uncertainty.*

40  
41  
42 The PAR estimation methods employed for the individual exposures in the ComPARE  
43  
44 Study are presented in Table 1. Since 95% confidence intervals (CIs) cannot be easily calculated  
45  
46 for PARs<sup>38</sup>, Monte Carlo simulation methods were used to estimate 95% CIs around PAR  
47  
48 estimates, where the RR values were drawn from a log normal distribution derived from the RR  
49  
50 and its associated variance estimated from 95% CIs while prevalence values were drawn from a  
51  
52 binomial distribution with parameter  $n$  as the number of survey participants and parameter  $p$  as  
53  
54 the prevalence of exposure estimated from the survey. We simulated 10,000 samples and used  
55  
56  
57  
58  
59  
60

1  
2  
3 the 2.5<sup>th</sup> and 97.5<sup>th</sup> percentiles of the resulting PAR distribution as the lower and upper limits of  
4  
5 its 95% CI.<sup>39 40</sup>  
6

### 7 *Estimation of Avoidable Cancers*

#### 8 *Exposure Prevalence Data*

9  
10 To estimate the future avoidable cancer burden to 2042, it is necessary to project  
11  
12 exposure prevalence (e.g. to 2032 if a 10-year latency period is used). We used the exposure  
13  
14 prevalence data hierarchy outlined above to identify the optimal exposure prevalence data. For  
15  
16 these data, we focused on sources with longitudinal surveys. For exposures where historical data  
17  
18 allowed past trends to be observed, one of several approaches to model future prevalence were  
19  
20 used. These included linear, logistic growth, multinomial logistic regression, and exponential  
21  
22 curves to predict the future proportion of the population exposed. Prevalence estimates were  
23  
24 projected by sex, and various levels of exposure prevalence. Models were selected based on  
25  
26 expert opinion of the visual evaluation of the fit to past data trends and by avoiding extreme  
27  
28 projection scenarios that might have arisen because of some overly influential data points. The  
29  
30 different approaches to model future prevalence reflect different potential scenarios. Logistic  
31  
32 growth considers that the prevalence of the exposure would reach a future steady state, while  
33  
34 multinomial logistic regression predicts that the past exposure observed trend would continue  
35  
36 relatively unchanged into the future. Exponential /logarithmic curves are a compromise between  
37  
38 the logistic and multinomial approaches, and involve an assumption that the past trend would  
39  
40 continue, but at a slower pace. We projected exposure data for the combined population and for  
41  
42 males and females separately, for both national and provincial estimates, where the data allowed.  
43  
44  
45  
46  
47  
48  
49  
50

#### 51 *Cancer Incidence Projections*

52  
53  
54 Cancer incidence frequencies and rates were projected by extrapolating past trends using  
55  
56 various statistical models. In the past, trends over age at diagnosis, year of diagnosis (period)  
57  
58  
59  
60

1  
2  
3 and/or year of birth (cohort) as well as hybrids of these models have been used. More recently,  
4 the age-period-cohort<sup>41</sup> and the age-drift-period-cohort (Nordpred)<sup>42</sup> models have been widely  
5 used. For the ComPARE study, the R package ‘Canproj’<sup>43</sup> was used to project cancer incidence  
6 from 2012 to 2042. The package projects forward to a maximum of 30 years, which suited our  
7 needs, based on the uncertainty surrounding cancer sites for which secondary or primary  
8 prevention interventions were being scaled up (e.g., colorectal, breast, lung, and cervical  
9 cancers) or reduced (e.g., prostate cancer).

19 Canproj combines cancer projection methods that have been used in the last 30 years to  
20 select the best fitted model for the data, using a decision algorithm to identify the most  
21 appropriate projection (Supplementary Figure 1). The models available in Canproj include: age-  
22 only, age-period (including common trend and age-specific trend), age-cohort and Nordpred<sup>42</sup>  
23 (age-drift-period-cohort; negative-binomial distribution may replace the Poisson distribution  
24 when over-dispersion appears). All models provide projected age-specific incidence rates and  
25 counts. Through the decision algorithm the Canproj methods produce more realistic projection  
26 estimates than other approaches, such as the Poisson regression method<sup>44</sup>, the polynomial  
27 regression and natural spline methods<sup>45</sup>, the joinpoint method<sup>46</sup> and the Bayesian Markov Chain  
28 Monte Carlo methods<sup>47</sup> by taking advantage of specific aspects of all of these methods to fit the  
29 best model. We evaluated all findings, independently of goodness-of-fit, to inspect the face  
30 validity of the projections.

### 47 *Defining Counterfactual Scenarios*

49 Within our avoidable cancers (PIF) framework we examined a range of exposure prevalence  
50 reduction scenarios – or counterfactuals. Our primary counterfactuals were based on population-  
51 based interventions which have been shown to be beneficial in experimental studies, and which  
52 could be scaled up to the population level. We conducted a systematic literature search of

1  
2  
3 interventions for each exposure and identified their effects from reviews, meta-analyses or large  
4 intervention (individual and/or community level) trials. For all exposures, we also included  
5 models with fixed prevalence reductions of 10%, 25%, 50% and 100% for every year between  
6 2018 and 2042.  
7  
8  
9  
10  
11

### 12 *Potential Impact Fraction Estimation – Defining Latency of Interventions*

13  
14 Using projected exposure prevalence, cancer incidence and a range of counterfactual scenarios,  
15 we then estimated the proportions and numbers of avoidable cancers in Canada from 2018 to  
16 2042. To present these results, we plotted the number of projected cancers under the baseline  
17 projection scenario (if no change in exposure prevalence were to occur), followed by the  
18 incidence estimated under a range of counterfactual scenarios.  
19  
20  
21  
22  
23  
24  
25

26 To evaluate the assumed fixed latency period, we conducted sensitivity analyses using  
27 some other assumptions for the statistical distribution of latency periods, e.g., including the  
28 uniform, modified Weibull and binomial distributions. These alternative distributions were each  
29 chosen to have a mean of 10 years and range from 0 to 15 years. Incorporating a distribution of  
30 latency periods into PIF estimation allowed us to better predict the transitional effect of  
31 counterfactual interventions.  
32  
33  
34  
35  
36  
37  
38  
39

### 40 *Consideration of Multiple Risk Factors and Joint Effects*

41  
42 As with other burden estimation efforts, our primary analyses were focused on the attributable  
43 and avoidable proportions and numbers of cancers related to individual exposures separately.  
44 This approach is an oversimplification because several exposures might be known to have joint  
45 impact/interactions on cancer risk. Several well-characterized examples include alcohol and  
46 tobacco for various cancer sites<sup>48</sup>, and overweight/obesity and physical inactivity for colorectal  
47 cancer.<sup>49</sup> Where possible, we have also estimated the impact of multiple risk factors for a series  
48 of scenarios where the scientific literature has suggested the existence of combined or synergistic  
49  
50  
51  
52  
53  
54  
55  
56  
57  
58  
59  
60



1  
2  
3 effects. When exposures are strongly associated and/or their interaction on cancer risk departs  
4 from multiplicative risk, Levin's formula to estimate PAR of individual risk factors must be used  
5 with caution. In order to combine PAR across exposures we used the Miettinen-Steenland  
6 Approach for any combined or "summary" estimates.  
7  
8  
9  
10  
11

### 12 *Sensitivity analyses*

13  
14 Our sensitivity analyses sought to characterize potential bias in the available prevalence and risk  
15 data. Since we relied on data from self-report questionnaires for some exposures, such as  
16 alcohol, physical activity, and body weight, we expected a certain degree of misreporting. In our  
17 sensitivity analyses, we corrected the reported prevalence by using studies that had validated the  
18 survey data, based on small samples of objective measurements, and then using sex-specific  
19 correction factors. Some exposures had considerable (>10%) non-response rates (i.e. responded  
20 'don't know' or 'refuse to answer'), and for these cases in our main analysis, we assumed that  
21 non-responders had been unexposed to the risk factors in question. In the sensitivity analyses, we  
22 imputed exposure values using both missing-at-random and missing-not-at-random assumptions.  
23 For the missing-at-random scenario, we assumed that non-response was unrelated to the  
24 exposure status, and hence that the exposure distribution among non-responders was identical to  
25 that of responders. For the missing-not-at-random scenario, we assumed that the non-responders  
26 were all exposed, and that their exposure distribution was identical to the exposed survey  
27 responders.  
28  
29  
30  
31  
32  
33  
34  
35  
36  
37  
38  
39  
40  
41  
42  
43  
44  
45

### 46 *Patient and Public Involvement*

47  
48  
49 No patients or public were involved in this study protocol.  
50  
51  
52  
53  
54  
55  
56  
57  
58  
59  
60

## DISCUSSION

In the ComPARE Study, we developed approaches for each step of data collection, analysis, uncertainty estimation, and sensitivity analyses, in order to arrive at plausible PAR estimates for cancer incidence. Furthermore, this approach provides a methodologically rigorous framework for long-term projections of cancer burden and the relative impacts of different population-based interventions for cancer prevention. As new cancer risk factor prevention strategies are developed, their subsequent impact on the future cancer burden can easily be integrated into this project for a comparative analysis of intervention strategies.

The estimates from this project will be relevant to a broad audience, ranging from those working in cancer prevention and more broadly in health promotion, to cancer advocacy groups, public health and healthcare planners, health policy makers, clinicians and the public to inform priority setting in prevention programming and resources; allocation of funding to areas of unmet need; etc. We have developed this project in collaboration with our knowledge translation partner – the Canadian Cancer Society (CCS). As a primary end-user of the data generated from this project, CCS's input into the design and desired output of the project has been invaluable. We encourage other groups to plan knowledge translation via similar partnership arrangements from the initiation phase of the project.

### *Methodologic Extensions*

During this project we encountered several methodologic components that were comparatively under-developed. For example, while several groups have conducted large attributable risk estimation projects, few, if any, have systematically assessed the impact of multiple risk factors. Our examination of approaches for multiple risk factors adds to the literature and provides validation of the estimates produced in this project. In addition, we have considered projections of both the exposure prevalence and cancer incidence data with multiple

1  
2  
3 approaches. Previous projects have assumed fixed cancer incidence or exposure prevalence for  
4  
5 future projections, both are unrealistic. Furthermore, in the application of our counterfactual  
6  
7 scenarios, we tested and applied several lag time models to fit the most likely windows of  
8  
9 exposure and their associated subsequent changes in cancer incidence. In addition, we have  
10  
11 worked in collaboration with key knowledge end-users to develop counterfactual scenarios that  
12  
13 best match realistic expectations for cancer prevention programs.  
14  
15

### 16 17 *Limitations*

18  
19 Our framework, while building on previous approaches, has a number of limitations.  
20  
21 Long-term projections of exposure prevalence and cancer incidence are statistically challenging  
22  
23 and involve a great deal of uncertainty. Although we have strived to identify the highest quality  
24  
25 exposure prevalence and cancer incidence datasets, and used methodologically sound approaches  
26  
27 for modelling, our results still need to be interpreted with caution. The resulting projections are a  
28  
29 direct product of the validity of the input data on exposure prevalence and associated relative  
30  
31 risks. Using data of poor quality or having questionable validity may result in erroneous  
32  
33 projections. For this reason, we included population-based, nationally-representative surveys to  
34  
35 estimate exposure prevalence when they were available. Many of our exposure measures,  
36  
37 particularly for the lifestyle risk/protective factors, were based on self-reported data. Where  
38  
39 possible, we modelled the potential impact of reporting biases on our estimates and included  
40  
41 analyses focused on directly measured exposures.  
42  
43  
44  
45

46  
47 For several infectious agents including Epstein-Barr virus, *Helicobacter pylori* and  
48  
49 human papillomavirus, large-population-based estimates of prevalence were not available for  
50  
51 Canada. For these instances, we included case series, case-control, and cohort studies, as well as  
52  
53 population-based surveys extracted from populations from the United States and if not available,  
54  
55 then Western Europe. The use of a more sensitive assay for the detection of *H. pylori* has  
56  
57  
58  
59  
60

1  
2  
3 substantially increased the proportion of non-cardia gastric cancers attributable to this infectious  
4 agent.<sup>50</sup> To account for the new gold standard, the included studies will be corrected for  
5  
6 measurement error.  
7  
8

9  
10 In terms of cancer incidence projections, we relied on the Canproj program<sup>43</sup>, which uses  
11 age-period-cohort models and the extension of the Nordpred model that has been widely used by  
12 other research groups for long-term projections of cancer incidence. However, errors in estimates  
13 are inevitable when projecting 30 years in the future as the models do not account for future  
14 changes in risk factors (i.e. population changes in smoking patterns, diet, etc.). In addition, to  
15 deal with some of the uncertainty inherent in projections, expert opinion was used when the  
16 projection model selected by Canproj was implausible, which introduces some degree of bias to  
17 the decisions.  
18  
19

20  
21 The Canadian Cancer Registry is a high-quality database with good case ascertainment of  
22 malignant tumours. Very few incident cancer cases are missed in the CCR and therefore any bias  
23 would be minimal and would not affect our results.<sup>37</sup> However, data for the province of Quebec  
24 were extrapolated from 2010, as data for 2012 were not available, which is a limitation for the  
25 national counts. Ethnicity was not taken into account in these estimates for various reasons.  
26 Unlike other national cancer registries, the CCR does not provide incidence data by ethnicity.  
27 Canada is not a populous country and stratifying cancer incidence by sex, age and ethnicity  
28 would lead to few observations. Furthermore, ethnicity-specific risk estimates and prevalence  
29 data would not be available at this time. However, for ultraviolet radiation (UVR) exposure,  
30 ethnicity was taken into account, as there is a strong interaction between UVR and ethnicity.  
31  
32

### 33 *Conclusions*

34 We have described a methodologic framework for attributable risk estimation and cancer  
35 projection that extends our previous research in PAR and PIFs. The application of this  
36  
37  
38  
39  
40  
41  
42  
43  
44  
45  
46  
47  
48  
49  
50

1  
2  
3 framework will provide estimates of both current attributable and future avoidable disease risk in  
4  
5 Canada. These findings will be of use to those working in cancer prevention, public health and  
6  
7 healthcare planners, health policy makers, healthcare providers and the general public for a wide  
8  
9 range of applications in cancer control and prevention.  
10  
11  
12  
13  
14  
15  
16  
17  
18  
19  
20  
21  
22  
23  
24  
25  
26  
27  
28  
29  
30  
31  
32  
33  
34  
35  
36  
37  
38  
39  
40  
41  
42  
43  
44  
45  
46  
47  
48  
49  
50  
51  
52  
53  
54  
55  
56  
57  
58  
59  
60

For peer review only

### Competing Interests

We have read and understood the BMJ Group policy on declaration of interests and declare no competing interests.

### Contributor Statement

D.R.B, C.M.F., S.D.W., W.D.K, E.L.F., P.D., P.J.V., R.N., and P.De. were responsible for the study conception. D.R.B., A.E.P., S.D.W., W.D.K., E.L.F., P.D., P.J.V., Y.R., F.K., X.G., R.N, L.S., P.De., K.V., D.O., P.H, C.M.F. contributed substantially to the study design. D.R.B, A.E.P. and Y.R. drafted the manuscript. D.R.B., A.E.P., S.D.W., W.D.K., E.L.F., P.D., P.J.V., Y.R., F.K., X.G., R.N, L.S., P.De., K.V., D.O., P.H, C.M.F. revised the draft paper, gave final approval of this version to be accountable for all aspects of the work in ensuring that questions related to the accuracy or integrity of any part of the work are appropriately investigated and resolved.

### Licence to BMJ Publishing Group Limited

I Darren Brenner, The Corresponding Author of this article contained within the original manuscript which includes any diagrams & photographs within and any related or stand-alone film submitted has the right to grant on behalf of all authors and does grant on behalf of all authors, a licence to the BMJ Publishing Group Ltd and its licencees, to permit this Contribution (if accepted) to be published in the BMJ Open and any other BMJ Group products and to exploit all subsidiary rights.

### Transparency Declaration

Darren Brenner affirms that this manuscript is an honest, accurate, and transparent account of the study being reported; that no important aspects of the study have been omitted; and that any discrepancies from the study as planned (and, if relevant, registered) have been explained.

### Funding

This research is supported by a Canadian Cancer Society Research Institute Partner Prevention Research Grant (#703106).

## References

1. Canadian Cancer Society's Advisory Committee on Cancer Statistics. Canadian Cancer Statistics 2015. Toronto, Ontario: Canadian Cancer Society, 2015.
2. Xie L, Semenciw R, Mery L. Cancer incidence in Canada: trends and projections (1983-2032). *Health promotion and chronic disease prevention in Canada : research, policy and practice* 2015;35 Suppl 1:2-186. [published Online First: 2015/05/27]
3. Bray F, Moller B. Predicting the future burden of cancer. *Nat Rev Cancer* 2006;6(1):63-74.
4. Chen J, Moir D, Whyte J. Canadian population risk of radon induced lung cancer: a re-assessment based on the recent cross-Canada radon survey. *Radiation protection dosimetry* 2012;152(1-3):9-13. doi: 10.1093/rpd/ncs147 [published Online First: 2012/08/10]
5. Al-Arydah M. Population attributable risk associated with lung cancer induced by residential radon in Canada: Sensitivity to relative risk model and radon probability density function choices: In memory of Professor Jan M. Zielinski. *The Science of the total environment* 2017;596-597:331-41. doi: 10.1016/j.scitotenv.2017.04.067 [published Online First: 2017/04/25]
6. Krueger H, Turner D, Krueger J, et al. The economic benefits of risk factor reduction in Canada: tobacco smoking, excess weight and physical inactivity. *Canadian journal of public health = Revue canadienne de sante publique* 2014;105(1):e69-78. [published Online First: 2014/04/17]
7. Krueger H, Koot JM, Rasali DP, et al. Regional variations in the economic burden attributable to excess weight, physical inactivity and tobacco smoking across British Columbia. *Health promotion and chronic disease prevention in Canada : research, policy and practice* 2016;36(4):76-86. [published Online First: 2016/04/15]
8. Peterson E, Aker A, Kim J, et al. Lung cancer risk from radon in Ontario, Canada: how many lung cancers can we prevent? *Cancer causes & control : CCC* 2013;24(11):2013-20. doi: 10.1007/s10552-013-0278-x [published Online First: 2013/08/29]
9. Brenner DR, Grevers X, Grundy A, et al. Cancer incidence attributable to inadequate physical activity in Alberta, Canada in 2012. *CMAJ Open* 2016;Under review
10. Brenner DR, Grundy A, Poirier AE, et al. Cancer Incidence Attributable to Excess Body Weight in Alberta, Canada. *CMAJ Open* 2016;Submitted Manuscript

11. Grevers X, Grundy A, Poirier AE, et al. Cancer incidence attributable to the use of oral contraceptives and hormone therapy in Alberta in 2012. *CMAJ Open* 2016;4(4):E754-e59. doi: 10.9778/cmajo.20160046 [published Online First: 2016/12/27]
12. Grundy A, Poirier AE, Khandwala F, et al. Cancer incidence attributable to red and processed meat consumption in Alberta in 2012. *CMAJ Open* 2016;4(4):E768-e75. doi: 10.9778/cmajo.20160036 [published Online First: 2016/12/27]
13. Grundy A, Poirier AE, Khandwala F, et al. Cancer incidence attributable to insufficient fruit and vegetable consumption in Alberta in 2012. *CMAJ Open* 2016;4(4):E760-e67. doi: 10.9778/cmajo.20160037 [published Online First: 2016/12/27]
14. Grundy A, Poirier AE, Khandwala F, et al. Cancer incidence attributable to insufficient fibre consumption in Alberta in 2012. *CMAJ Open* 2017;5(1):E7-E13. doi: 10.9778/cmajo.20160043
15. Poirier AE, Grundy A, Khandwala F, et al. Cancer incidence attributable to tobacco in Alberta, Canada, in 2012. *CMAJ Open* 2016;4(4):E578-e87. doi: 10.9778/cmajo.20150069 [published Online First: 2016/12/27]
16. Kuhn R, Rothman DS, Turner S, et al. Beyond Attributable Burden: Estimating the Avoidable Burden of Disease Associated with Household Air Pollution. *PLOS ONE* 2016;11(3):e0149669. doi: 10.1371/journal.pone.0149669
17. Baade PD, Meng X, Sinclair C, et al. Estimating the future burden of cancers preventable by better diet and physical activity in Australia. *The Medical journal of Australia* 2012;196(5):337-40. [published Online First: 2012/03/22]
18. Pandeya N, Wilson LF, Webb PM, et al. Cancers in Australia in 2010 attributable to the consumption of alcohol. *Australian and New Zealand journal of public health* 2015;39(5):408-13. doi: 10.1111/1753-6405.12456
19. Kendall BJ, Wilson LF, Olsen CM, et al. Cancers in Australia in 2010 attributable to overweight and obesity. *Australian and New Zealand journal of public health* 2015;39(5):452-7. doi: 10.1111/1753-6405.12458 [published Online First: 2015/10/07]
20. Nagle CM, Wilson LF, Hughes MCB, et al. Cancers in Australia in 2010 attributable to the consumption of red and processed meat. *Australian and New Zealand journal of public health* 2015;39(5):429-33. doi: 10.1111/1753-6405.12450



- 1  
2  
3 21. Arnold M, Pandeya N, Byrnes G, et al. Global burden of cancer attributable to high body-mass  
4 index in 2012: a population-based study. *The Lancet Oncology* 2015;16(1):36-46. doi:  
5 10.1016/S1470-2045(14)71123-4  
6  
7
- 8  
9 22. Whiteman DC, Webb PM, Green AC, et al. Cancers in Australia in 2010 attributable to modifiable  
10 factors: introduction and overview. *Australian and New Zealand journal of public health*  
11 2015;39(5):403-07. doi: 10.1111/1753-6405.12468  
12  
13
- 14 23. Mathers CD, Loncar D. Projections of global mortality and burden of disease from 2002 to 2030.  
15 *PLoS Med* 2006;3(11):e442. doi: 10.1371/journal.pmed.0030442 [published Online First:  
16 2006/11/30]  
17  
18
- 19 24. World Health Organization. Global health risks: mortality and burden of disease attributable to  
20 selected major risks: World Health Organization 2009.  
21  
22  
23
- 24 25. Parkin DM. 1. The fraction of cancer attributable to lifestyle and environmental factors in the UK in  
25 2010. *British journal of cancer* 2011;105(S2):S2-S5.  
26  
27
- 28 26. Barendregt JJ, Veerman JL. Categorical versus continuous risk factors and the calculation of  
29 potential impact fractions. *Journal of epidemiology and community health* 2010;64(3):209-12. doi:  
30 10.1136/jech.2009.090274 [published Online First: 2009/08/21]  
31  
32
- 33 27. Arnold M, Touillaud M, Dossus L, et al. Cancers in France in 2015 attributable to high body mass  
34 index. *Cancer epidemiology* 2018;52:15-19. doi: 10.1016/j.canep.2017.11.006 [published Online  
35 First: 2017/11/22]  
36  
37  
38
- 39 28. Gwenn M, Ivana K, Joséphine B, et al. Tobacco-attributable burden of cancer according to  
40 socioeconomic position in France. *International Journal of Cancer*;0(0) doi: doi:10.1002/ijc.31328  
41  
42
- 43 29. Shield KD, Marant Micallef C, Hill C, et al. New cancer cases in France in 2015 attributable to  
44 different levels of alcohol consumption. *Addiction (Abingdon, England)* 2018;113(2):247-56. doi:  
45 10.1111/add.14009 [published Online First: 2017/08/24]  
46  
47  
48
- 49 30. Levin ML. The occurrence of lung cancer in man. *Acta - Unio Internationalis Contra Cancrum*  
50 1953;9(3):531-41. [published Online First: 1953/01/01]  
51  
52
- 53 31. Morgan SL, Winship C. Counterfactuals and causal inference: Cambridge University Press 2014.  
54
- 55 32. Morgenstern H, Bursic ES. A method for using epidemiologic data to estimate the potential impact  
56 of an intervention on the health status of a target population. *Journal of community health*  
57 1982;7(4):292-309. [published Online First: 1982/01/01]  
58  
59

- 1  
2  
3 33. Elm Ev, Altman DG, Egger M, et al. Strengthening the reporting of observational studies in  
4 epidemiology (STROBE) statement: guidelines for reporting observational studies. *BMJ*  
5 2007;335(7624):806-08. doi: 10.1136/bmj.39335.541782.AD  
6  
7  
8  
9 34. Stroup DF, Berlin JA, Morton SC, et al. Meta-analysis of observational studies in epidemiology: A  
10 proposal for reporting. *Jama* 2000;283(15):2008-12. doi: 10.1001/jama.283.15.2008  
11  
12  
13 35. World Cancer Research Fund / American Institute for Cancer Research. Food, Nutrition, Physical  
14 Activity, and the Prevention of Cancer: a Global Perspective. Washington, D.C: American Institute  
15 for Cancer Research, 2007.  
16  
17  
18 36. International Agency for Research on Cancer. IARC Monographs on the Evaluation of Carcinogenic  
19 Risks to Humans Lyon, France 2017 [Available from: <http://monographs.iarc.fr/> accessed June 29  
20 2017.  
21  
22  
23  
24 37. Statistics Canada. Canadian Cancer Registry (CCR) Ottawa, ON: Statistics Canada; 2014  
25 [Available from: <http://www23.statcan.gc.ca/imdb/p2SV.pl?Function=getSurvey&Id=329031>  
26 accessed April 27 2017.  
27  
28  
29 38. Greenland S. Interval estimation by simulation as an alternative to and extension of confidence  
30 intervals. *International journal of epidemiology* 2004;33(6):1389-97. doi: 10.1093/ije/dyh276  
31 [published Online First: 2004/08/21]  
32  
33  
34  
35 39. Lee IM, Shiroma EJ, Lobelo F, et al. Effect of physical inactivity on major non-communicable  
36 diseases worldwide: an analysis of burden of disease and life expectancy. *The Lancet*  
37 2012;380(9838):219-29. doi: 10.1016/S0140-6736(12)61031-9  
38  
39  
40  
41 40. Renehan AG, Soerjomataram I, Tyson M, et al. Incident cancer burden attributable to excess body  
42 mass index in 30 European countries. *International journal of cancer Journal international du cancer*  
43 2010;126(3):692-702. doi: 10.1002/ijc.24803 [published Online First: 2009/08/01]  
44  
45  
46 41. Clayton D, Schifflers E. Models for temporal variation in cancer rates. II: age-period-cohort models.  
47 *Stat Med* 1987;6:469-81.  
48  
49  
50 42. Moller B. Prediction of cancer incidence in the Nordic countries up to the year 2020. *Eur J Cancer*  
51 *Prev* 2002;11(Suppl.):S1-S96.  
52  
53  
54 43. Qiu Z, Hatcher J, Team C-PW. Canproj—The R package of cancer projection methods based on  
55 generalized linear models for age, period, and/or cohort. *Technique Report for Cancer Projections*  
56 *Network (C-Proj) Alberta: Alberta Health Services* 2011  
57  
58  
59

- 1  
2  
3 44. Dyba T, Hakulinen T, Paivarinta L. A simple non-linear model in incidence prediction. *Statist Med*  
4 1997;16:2297-309.  
5  
6  
7 45. Carstensen B. Age-period-cohort models for the Lexis diagram. *Statistics in medicine*  
8 2007;26(15):3018-45. doi: 10.1002/sim.2764 [published Online First: 2006/12/21]  
9  
10  
11 46. Kim HJ, Fay MP, Feuer EJ, et al. Permutation tests for joinpoint regression with applications to  
12 cancer rates. *Statistics in medicine* 2000;19(3):335-51. [published Online First: 2000/01/29]  
13  
14  
15 47. Bray I. Application of Markov chain Monte Carlo methods to projecting cancer incidence and  
16 mortality. *Journal of the Royal Statistical Society: Series C (Applied Statistics)* 2002;51(2):151-64.  
17 doi: 10.1111/1467-9876.00260  
18  
19  
20 48. Hart CL, Davey Smith G, Gruer L, et al. The combined effect of smoking tobacco and drinking  
21 alcohol on cause-specific mortality: a 30 year cohort study. *BMC public health* 2010;10(1):789. doi:  
22 10.1186/1471-2458-10-789  
23  
24  
25 49. Samad AKA, Taylor RS, Marshall T, et al. A meta-analysis of the association of physical activity  
26 with reduced risk of colorectal cancer. *Colorectal Disease* 2005;7(3):204-13. doi: 10.1111/j.1463-  
27 1318.2005.00747.x  
28  
29  
30  
31 50. Plummer M, Franceschi S, Vignat J, et al. Global burden of gastric cancer attributable to  
32 *Helicobacter pylori*. *International journal of cancer Journal international du cancer*  
33 2015;136(2):487-90. doi: 10.1002/ijc.28999 [published Online First: 2014/06/04]  
34  
35  
36  
37  
38  
39  
40  
41  
42  
43  
44  
45  
46  
47  
48  
49  
50  
51  
52  
53  
54  
55  
56  
57  
58  
59  
60

## List of Tables and Figures with Captions

Table 1. The population attributable risk estimation methods employed for the individual exposures of interest in the ComPARE project.

Figure 1. Scope of project framework for estimation of current attributable and future avoidable disease burden. CHMS=Canadian Health Measures Survey, CCHS=Canadian Community Health Survey, Canadian, IARC=International Agency for Research on Cancer, WCRF=World Cancer Research Fund, CUP=Continuous Update Project, PIF=Potential Impact Fraction, PAR Population Attributable Risk

Figure 2. The process flow used for selecting risk estimates used in the ComPARE project. \*Quality determined using STrengthening the Reporting of OBservational studies in Epidemiology (STROBE)<sup>33</sup> guidelines for cohort and case-control studies and Meta-analysis Of Observational Studies in Epidemiology (MOOSE)<sup>34</sup> guidelines for meta-analysis

Figure 3. Representation of relevant exposure windows and latency onset considered for the ComPARE project.

Supplementary Table 1. Exposure and cancer site associations included in the ComPARE project

Supplementary Figure 1. Decision tree for cancer incidence projection model selection in Canproj.AC= Age-cohort model, AdPC= Age-drift-period-cohort model, Hybrid=age-only model or age-period model

\*Adapted from: *Canproj-The R package of cancer projection methods based on generalized linear models for age, period and/or cohort. Alberta Health Services: 2011-12-16.*

**Table 1.** The population attributable risk estimation methods employed for the individual exposures of interest in the ComPARE project.

| Formula for PAR Estimation                                                                                                                                                                           | Exposure                                                                                                                                                                                                                                                                                                                                                                                           |
|------------------------------------------------------------------------------------------------------------------------------------------------------------------------------------------------------|----------------------------------------------------------------------------------------------------------------------------------------------------------------------------------------------------------------------------------------------------------------------------------------------------------------------------------------------------------------------------------------------------|
| $\text{Formula 1: } PAR = \frac{Pe (RR - 1)}{1 + [Pe (RR - 1)]}$                                                                                                                                     | <ul style="list-style-type: none"> <li>• Tobacco (second-hand smoke)</li> <li>• UVR risk behaviours</li> <li>• Disinfection by-products</li> <li>• Low vitamin D</li> <li>• Low dietary calcium intake</li> <li>• <i>Helicobacter pylori</i></li> <li>• Hepatitis B</li> <li>• Hepatitis C</li> </ul>                                                                                              |
| $\text{Formula 2: } PAR = 1 - \sum_{i=0}^k \frac{p_{(c)i}}{RR_i}$                                                                                                                                    | <ul style="list-style-type: none"> <li>• Human papillomavirus</li> <li>• Epstein-Barr virus</li> <li>• Human T-cell lymphotropic virus type 1</li> <li>• Human herpesvirus 8</li> </ul>                                                                                                                                                                                                            |
| $\text{Formula 3: } PAR = \frac{(p_{e1} \times ERR_1) + (P_{e2} \times ERR_2) + \dots + (P_{ex} \times ERR_x)}{1 + ((p_{e1} \times ERR_1) + (P_{e2} \times ERR_2) + \dots + (P_{ex} \times ERR_x))}$ | <ul style="list-style-type: none"> <li>• Tobacco (active exposure)</li> <li>• Oral contraceptives</li> <li>• Hormone replacement therapy</li> <li>• Overweight/obesity</li> <li>• Insufficient fruit and vegetable intake</li> <li>• Red meat/processed meat intake</li> <li>• High alcohol intake</li> <li>• Insufficient dietary fibre intake</li> <li>• Physical activity/inactivity</li> </ul> |
| Individualized Methods                                                                                                                                                                               | <ul style="list-style-type: none"> <li>• Overall UV exposure</li> <li>• Air pollution</li> <li>• Radon</li> <li>• Insufficient fruit and vegetable intake</li> <li>• Red meat/processed meat intake</li> <li>• Insufficient fibre intake</li> <li>• Alcohol consumption</li> </ul>                                                                                                                 |

1  
2  
3 ERR=excess relative risk,  $i$ =exposure level,  $k$ = levels of exposure, PAR=population attributable  
4 risk,  $P_c$ = proportion of cases at the  $i$ th level of exposure,  $P_e$ =prevalence of exposure in the  
5 population, RR=relative risk, UV=ultraviolet; UVR=ultraviolet radiation  
6  
7  
8  
9  
10  
11  
12  
13  
14  
15  
16  
17  
18  
19  
20  
21  
22  
23  
24  
25  
26  
27  
28  
29  
30  
31  
32  
33  
34  
35  
36  
37  
38  
39  
40  
41  
42  
43  
44  
45  
46  
47  
48  
49  
50  
51  
52  
53  
54  
55  
56  
57  
58  
59  
60

For peer review only



Figure 1. Scope of project framework for estimation of current attributable and future avoidable disease burden. CHMS=Canadian Health Measures Survey, CCHS=Canadian Community Health Survey, Canadian, IARC=International Agency for Research on Cancer, WCRF=World Cancer Research Fund, CUP=Continuous Update Project, PIF=Potential Impact Fraction, PAR Population Attributable Risk

279x215mm (300 x 300 DPI)

Only

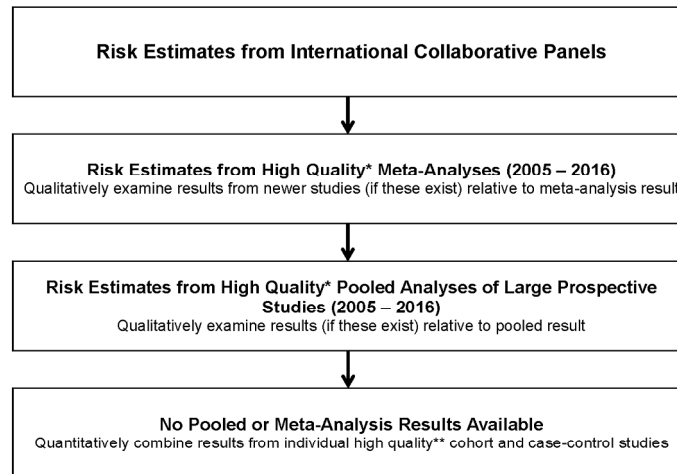

45 Figure 2. The process flow used for selecting risk estimates used in the ComPARE project.† \*Quality  
46 determined using SStrengthening the Reporting of OBservational studies in Epidemiology (STROBE)<sup>33</sup>  
47 guidelines for cohort and case-control studies and Meta-analysis Of Observational Studies in Epidemiology  
48 (MOOSE)<sup>34</sup> guidelines for meta-analysis

49 279x431mm (300 x 300 DPI)





Figure 3. Representation of relevant exposure windows and latency onset considered for the ComPARE project.

279x452mm (300 x 300 DPI)

Supplementary Table 1. Exposure and Cancer Site Associations to be Included in the ComPARE project\*

| Cancer Site of Interest                  | Associated Modifiable Risk Factors                                                                                                                                                                                                                                                            |
|------------------------------------------|-----------------------------------------------------------------------------------------------------------------------------------------------------------------------------------------------------------------------------------------------------------------------------------------------|
| Lung                                     | Non-starchy vegetable intake<br>Fruit intake<br>Physical activity<br>Active tobacco smoking<br>Passive tobacco smoking<br>Air pollution<br>Radon<br>Arsenic                                                                                                                                   |
| Breast                                   | Oral contraceptives<br>Hormone replacement therapy<br>Insufficient fruit<br>Alcohol<br>Red meat<br>Processed meat<br>Insufficient vitamin D<br>Overweight/Obesity<br>Physical inactivity<br>Sedentary behavior<br>Abdominal obesity                                                           |
| Colorectal Cancer                        | Insufficient fruit<br>Insufficient non-starchy vegetables<br>Alcohol<br>Red meat intake<br>Processed meat intake<br>Fiber intake<br>Insufficient vitamin D<br>Insufficient calcium<br>Overweight/Obesity<br>Physical inactivity<br>Sedentary behavior<br>Abdominal obesity<br>Tobacco smoking |
| Gastric cancer,<br>Gastric cardia cancer | Insufficient fruit<br>Alcohol<br>Red meat<br>Processed meat<br>Insufficient fibre<br>Overweight/Obesity<br>Tobacco smoking<br><i>Helicobacter pylori</i> (non-cardia only)                                                                                                                    |
| Oesophagus Cancer                        | Overweight/Obesity<br>Physical inactivity<br>Tobacco smoking<br>Alcohol<br>Insufficient non-starchy vegetables<br>Insufficient fruit<br>Processed meat                                                                                                                                        |

|                                 |                                                                                                                                                                                                                                                              |
|---------------------------------|--------------------------------------------------------------------------------------------------------------------------------------------------------------------------------------------------------------------------------------------------------------|
| Bladder Cancer                  | <ul style="list-style-type: none"> <li>Insufficient non-starchy vegetables</li> <li>Insufficient fruit</li> <li>Physical inactivity</li> <li>Tobacco smoking</li> <li>Insufficient vitamin D</li> <li>Arsenic</li> <li>Disinfection by-products</li> </ul>   |
| Pancreas Cancer                 | <ul style="list-style-type: none"> <li>Insufficient non-starchy vegetables</li> <li>Insufficient fruit</li> <li>Alcohol</li> <li>Red meat</li> <li>Processed meat</li> <li>Overweight/Obesity</li> <li>Abdominal obesity</li> <li>Tobacco smoking</li> </ul> |
| Endometrial Cancer              | <ul style="list-style-type: none"> <li>Oral contraceptives</li> <li>Hormone therapy</li> <li>Overweight/Obesity</li> <li>Physical inactivity</li> <li>Sedentary behavior</li> <li>Abdominal obesity</li> </ul>                                               |
| Oral Cancer / Oropharynx Cancer | <ul style="list-style-type: none"> <li>Insufficient non-starchy vegetables</li> <li>Tobacco smoking</li> <li>Human papillomavirus (HPV)</li> </ul>                                                                                                           |
| Liver Cancer                    | <ul style="list-style-type: none"> <li>Insufficient non-starchy vegetables</li> <li>Alcohol</li> <li>Overweight/Obesity</li> <li>Physical inactivity</li> <li>Tobacco smoking</li> <li>Hepatitis B virus (HBV)</li> <li>Hepatitis C virus (HCV)</li> </ul>   |
| Ovarian Cancer                  | <ul style="list-style-type: none"> <li>Oral contraceptives</li> <li>Hormone Replacement therapy</li> <li>Insufficient non-starchy vegetables</li> <li>Overweight/Obesity</li> <li>Sedentary behavior</li> <li>Tobacco smoking</li> </ul>                     |
| Larynx Cancer                   | <ul style="list-style-type: none"> <li>Alcohol</li> <li>Insufficient non-starchy vegetables</li> <li>Tobacco smoking</li> <li>Human papillomavirus (HPV)</li> </ul>                                                                                          |
| Cervical Cancer                 | <ul style="list-style-type: none"> <li>Tobacco smoking</li> <li>Passive (second-hand) tobacco smoking</li> <li>Human papillomavirus (HPV)</li> </ul>                                                                                                         |
| Prostate Cancer                 | <ul style="list-style-type: none"> <li>Overweight/Obesity</li> <li>Abdominal obesity</li> </ul>                                                                                                                                                              |
| Kidney Cancer                   | <ul style="list-style-type: none"> <li>Overweight/Obesity</li> <li>Abdominal obesity</li> <li>Physical inactivity</li> <li>Tobacco smoking</li> <li>Vitamin D</li> </ul>                                                                                     |

|                                            |                                                                                                                   |
|--------------------------------------------|-------------------------------------------------------------------------------------------------------------------|
| Gallbladder Cancer                         | Tobacco smoking<br>Overweight/Obesity                                                                             |
| Melanoma                                   | Ultraviolet radiation (indoor tanning, sunburn, sunbathing, total exposure)                                       |
| Hodgkin Lymphoma                           | Epstein-Barr Virus (EBV)                                                                                          |
| Non-Hodgkin Lymphoma                       | Physical inactivity<br>Epstein-Barr Virus (EBV)(immuno-suppressed only)<br>Hepatitis C virus (HCV)                |
| Non-Melanoma Skin Cancer                   | Human Immunodeficiency virus (HIV)<br>Ultraviolet radiation (indoor tanning, sunburn, sunbathing, total exposure) |
| Nasopharyngeal Cancer                      | Epstein-Barr Virus (EBV)                                                                                          |
| Pharynx Cancer                             | HPV                                                                                                               |
| Thyroid Cancer                             | Overweight/Obesity<br>Abdominal Obesity                                                                           |
| Anal Cancer                                | Human papillomavirus (HPV)                                                                                        |
| Cholangiocarcinoma                         | Hepatitis B virus (HBV)<br>Hepatitis C virus (HCV)                                                                |
| Leukemia                                   | Human T-cell lymphotropic virus type 1 (HTLV-1)                                                                   |
| Burkitt Lymphoma                           | Epstein-Barr Virus (EBV)                                                                                          |
| Eye Cancer                                 | UV radiation                                                                                                      |
| Kaposi Sarcoma                             | Human herpesvirus 8                                                                                               |
| Lip Cancer                                 | UV radiation (indoor tanning, sunburn, sunbathing, total exposure)                                                |
| Extranodal NK/T cell lymphoma – nasal type | Epstein-Barr Virus (EBV)                                                                                          |
| Mesothelioma                               | Asbestos                                                                                                          |
| Penile Cancer                              | Human papillomavirus (HPV)                                                                                        |
| Tonsil Cancer                              | Human papillomavirus (HPV)                                                                                        |
| Vaginal Cancer                             | Human papillomavirus (HPV)                                                                                        |
| Vulvar Cancer                              | Human papillomavirus (HPV)                                                                                        |

\*inclusion of exposure and cancer site associations were based on hierarchy of evidence collected from the International Agency for Research on Cancer monograph series, World Cancer Research Fund (WCRF) Second Expert Report, WCRF Continuous Update Projects and published meta-analyses of epidemiologic studies.

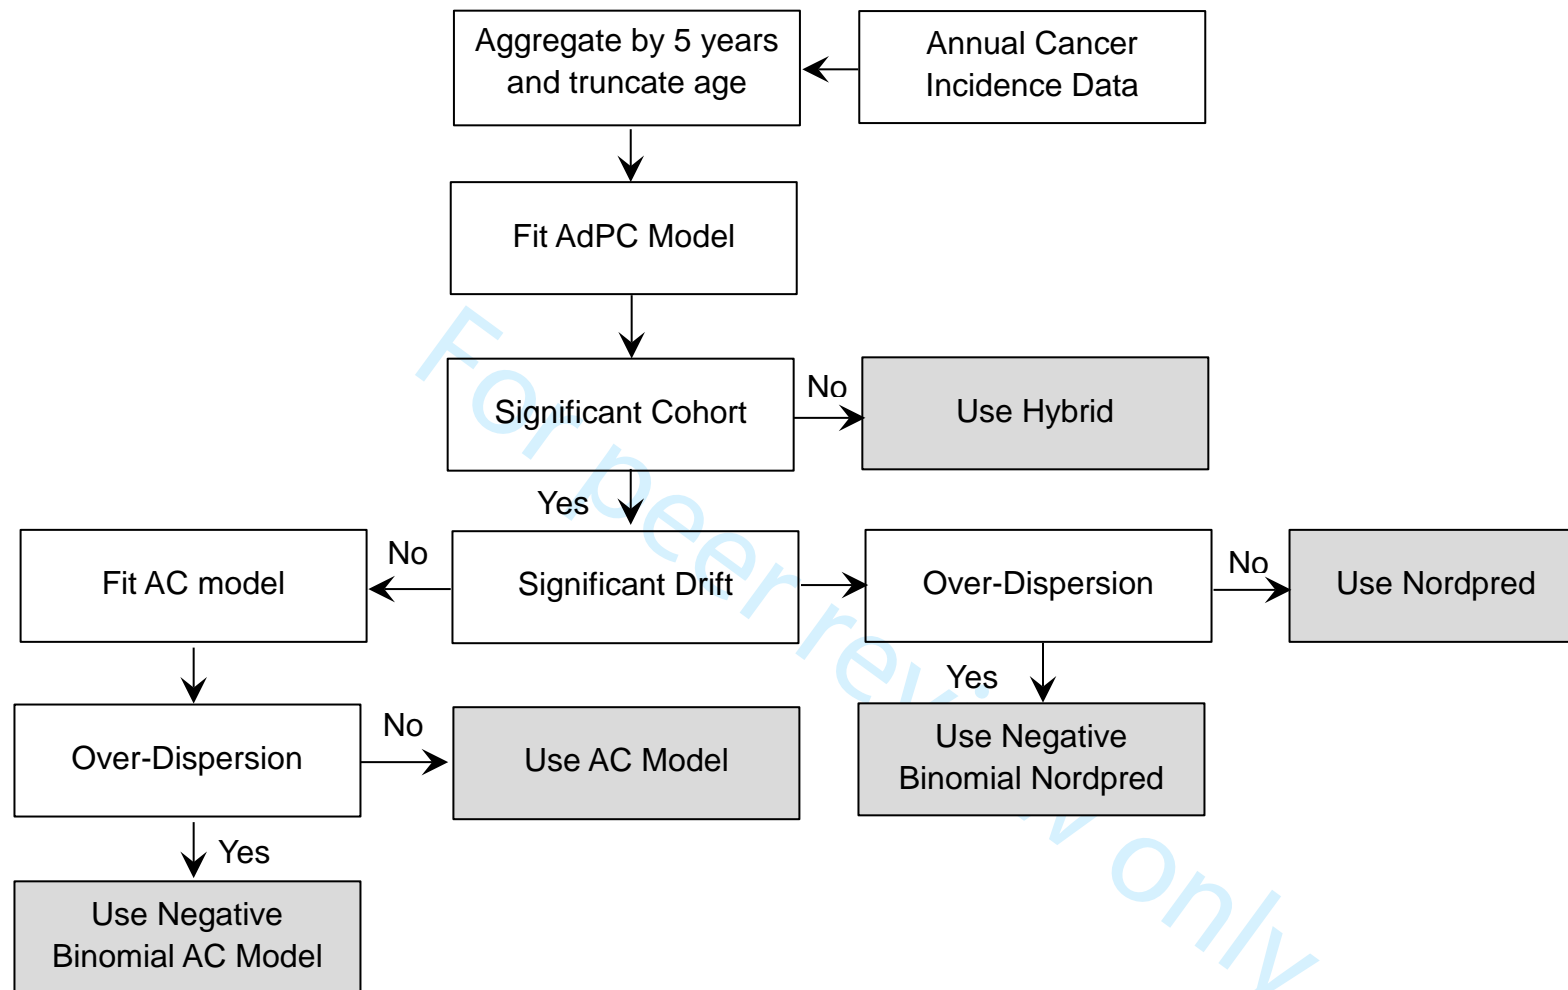

Supplementary Figure 1. Decision tree for cancer incidence projection model selection in Canproj.AC= Age-cohort model, AdPC= Age-drift-period-cohort model, Hybrid=age-only model or age-period model

\*Adapted from: *Canproj-The R package of cancer projection methods based on generalized linear models for age, period and/or cohort. Alberta Health Services: 2011-12-16.*
